# Supplementary material
Source: publisher figshare collection journal article supplement (https://gsapubs.figshare.com/articles/dataset/_/24128679)
Supplement: Supplementary file 1 [file 1]

## Sheet: Sheet1
TABLE S6. Lu–Hf ISOTOPE COMPOSITIONS OF ZIRCON GRAINS IN THE DIORITE PORPHYRIES FROM LISHAN, SULU BELT
Spot No.	176Hf/177Hf	1σ	176Lu/177Hf	1σ	176Yb/177Hf	1σ	t (Ma)	Apparent Age	εHf(0)	(176Hf/177Hf)t	1σ	εHf(t)	1σ	fLu/Hf	TDM2(Ma)	1σ
16	0.282376	1.83681e-05	0.00227533	1.80501e-05	0.0764853	0.000663545	749	749	-14.0152	0.282344	1.83681e-05	1.38761	0.838274	-0.931466	1566.67	81.7547
1	0.282125	1.65316e-05	0.00073605	7.5416e-06	0.023113	0.000180343	215	213	-22.8638	0.282123	1.65316e-05	-18.2548	0.787371	-0.97783	2395.75	73.1673
2	0.282134	1.60487e-05	0.000465241	9.02732e-07	0.0145539	6.14525e-05	215	216	-22.5513	0.282132	1.60487e-05	-17.9036	0.774076	-0.985987	2373.93	71.0594
3	0.282096	2.06415e-05	0.00188974	7.36143e-06	0.0597897	0.000377855	215	219	-23.9016	0.282089	2.06415e-05	-19.4572	0.900776	-0.94308	2470.21	91.211
4	0.282124	1.17487e-05	0.000721643	9.65235e-06	0.0214451	0.000483983	215	212	-22.9186	0.282121	1.17487e-05	-18.3075	0.671209	-0.978264	2399.06	51.997
5	0.282153	1.61964e-05	0.000472355	3.16699e-06	0.0135647	8.09202e-05	215	215	-21.8814	0.282151	1.61964e-05	-17.2344	0.778173	-0.985772	2332.04	71.7477
6	0.282159	3.46053e-05	0.000643208	1.16564e-05	0.019311	0.000250589	215	221	-21.6857	0.282156	3.46053e-05	-17.0629	1.33405	-0.980626	2321.22	153.301
7	0.282143	1.51361e-05	0.00143077	5.1002e-06	0.0447433	0.000187767	215	217	-22.2578	0.282137	1.51361e-05	-17.7473	0.751129	-0.956904	2363.62	66.9883
8	0.282129	1.40845e-05	0.00115182	3.87772e-06	0.0351503	0.000329891	215	210	-22.726	0.282125	1.40845e-05	-18.1761	0.724903	-0.965307	2390.59	62.325
9	0.282141	1.15515e-05	0.000527684	6.5918e-07	0.0169627	0.000148597	215	207	-22.3125	0.282139	1.15515e-05	-17.6736	0.666156	-0.984106	2359.5	51.1537
10	0.282133	1.57432e-05	0.000733369	9.06309e-06	0.0205951	7.28447e-05	215	210	-22.5863	0.28213	1.57432e-05	-17.9767	0.756123	-0.977911	2378.36	69.692
11	0.282127	2.23518e-05	0.000642435	6.87881e-06	0.0198093	0.000413887	215	216	-22.8256	0.282124	2.23518e-05	-18.2032	0.950542	-0.98065	2392.58	98.9359
12	0.282161	1.42198e-05	0.000624391	1.26806e-05	0.0187191	0.000291706	215	217	-21.6077	0.282158	1.42198e-05	-16.9822	0.729096	-0.981193	2316.17	62.9976
13	0.282102	1.12759e-05	0.000385686	6.81923e-06	0.011508	0.000148182	215	221	-23.6918	0.282101	1.12759e-05	-19.0333	0.660676	-0.988383	2444.63	49.888
14	0.28215	1.37594e-05	0.000605187	6.94353e-06	0.0189939	0.00040917	215	227	-21.9816	0.282148	1.37594e-05	-17.3536	0.717357	-0.981771	2339.43	60.9423
15	0.28215	1.65794e-05	0.00097394	1.71729e-05	0.0286084	0.000376402	215	212	-21.9967	0.282146	1.65794e-05	-17.4211	0.789658	-0.970664	2343.46	73.4135
17	0.282107	1.52552e-05	0.000765059	1.02705e-05	0.0229089	0.000439624	215	213	-23.5041	0.282104	1.52552e-05	-18.8995	0.754616	-0.976956	2436.05	67.4852
18	0.282124	1.39202e-05	0.000713234	8.16238e-06	0.0212842	0.000106229	215	207	-22.9273	0.282121	1.39202e-05	-18.315	0.721315	-0.978517	2399.53	61.6074
19	0.282138	1.26726e-05	0.000267177	6.53982e-07	0.00802354	8.86471e-05	215	215	-22.4349	0.282137	1.26726e-05	-17.759	0.691203	-0.991953	2364.98	56.1232
20	0.282134	1.66689e-05	0.000819415	1.59961e-05	0.0261347	0.000430472	215	214	-22.5546	0.282131	1.66689e-05	-17.9573	0.780544	-0.975319	2377.09	73.7874
21	0.282106	1.19164e-05	0.000726526	2.68875e-06	0.0230862	0.000180176	215	209	-23.5678	0.282103	1.19164e-05	-18.9578	0.662794	-0.978117	2439.71	52.7142

## Sheet: PlotDat2
Source sheet	Sheet1	900	0	1470	0	900	0
Plot name	ProbDens1	900.95	0	1660	0	2799.05	0
Plot Type	16	901.9	0	1660	1
1st free col	9	902.85	0	1470	1
Sigma Level	1	903.8	0	1470	0
Absolute Errs	TRUE	904.75	0	ErrBox	ErrBox
Symbol Type	1	905.7	0	2230	0
Inverse Plot	FALSE	906.65	0	2420	0
Color Plot	TRUE	907.6	0	2420	16
3D plot	FALSE	908.55	0	2230	16
Linear	FALSE	909.5	0	2230	0
Data Range	R2:S23	910.45	0	ErrBox	ErrBox
Filled Symbols	TRUE	911.4	0	2420	0
ConcAge	FALSE	912.35	0	2610	0
ConcSwap	FALSE	913.3	0	2610	4
1st Symbol-row	1	914.25	0	2420	4
		915.2	0	2420	0
		916.15	0	ErrBox	ErrBox
		917.1	0
		918.05	0
		919	0
		919.95	0
		920.9	0
		921.85	0
		922.8	0
		923.75	0
		924.7	0
		925.65	0
		926.6	0
		927.55	0
		928.5	0
		929.45	0
		930.4	0
		931.35	0
		932.3	0
		933.25	0
		934.2	0
		935.15	0
		936.1	0
		937.05	0
		938	0
		938.95	0
		939.9	0
		940.85	0
		941.8	0
		942.75	0
		943.7	0
		944.65	0
		945.6	0
		946.55	0
		947.5	0
		948.45	0
		949.4	0
		950.35	0
		951.3	0
		952.25	0
		953.2	0
		954.15	0
		955.1	0
		956.05	0
		957	0
		957.95	0
		958.9	0
		959.85	0
		960.8	0
		961.75	0
		962.7	0
		963.65	0
		964.6	0
		965.55	0
		966.5	0
		967.45	0
		968.4	0
		969.35	0
		970.3	0
		971.25	0
		972.2	0
		973.15	0
		974.1	0
		975.05	0
		976	0
		976.95	0
		977.9	0
		978.85	0
		979.8	0
		980.75	0
		981.7	0
		982.65	0
		983.6	0
		984.55	0
		985.5	0
		986.45	0
		987.4	0
		988.35	0
		989.3	0
		990.25	0
		991.2	0
		992.15	0
		993.1	0
		994.05	0
		995	0
		995.95	0
		996.9	0
		997.85	0
		998.8	0
		999.75	0
		1000.7	0
		1001.65	0
		1002.6	0
		1003.55	0
		1004.5	0
		1005.45	0
		1006.4	0
		1007.35	0
		1008.3	0
		1009.25	0
		1010.2	0
		1011.15	0
		1012.1	0
		1013.05	0
		1014	0
		1014.95	0
		1015.9	0
		1016.85	0
		1017.8	0
		1018.75	0
		1019.7	0
		1020.65	0
		1021.6	0
		1022.55	0
		1023.5	0
		1024.45	0
		1025.4	0
		1026.35	0
		1027.3	0
		1028.25	0
		1029.2	0
		1030.15	0
		1031.1	0
		1032.05	0
		1033	0
		1033.95	0
		1034.9	0
		1035.85	0
		1036.8	0
		1037.75	0
		1038.7	0
		1039.65	0
		1040.6	0
		1041.55	0
		1042.5	0
		1043.45	0
		1044.4	0
		1045.35	0
		1046.3	0
		1047.25	0
		1048.2	0
		1049.15	0
		1050.1	0
		1051.05	0
		1052	0
		1052.95	0
		1053.9	0
		1054.85	0
		1055.8	0
		1056.75	0
		1057.7	0
		1058.65	0
		1059.6	0
		1060.55	0
		1061.5	0
		1062.45	0
		1063.4	0
		1064.35	0
		1065.3	0
		1066.25	0
		1067.2	0
		1068.15	0
		1069.1	0
		1070.05	0
		1071	0
		1071.95	0
		1072.9	0
		1073.85	0
		1074.8	0
		1075.75	0
		1076.7	0
		1077.65	0
		1078.6	0
		1079.55	0
		1080.5	0
		1081.45	0
		1082.4	0
		1083.35	0
		1084.3	0
		1085.25	0
		1086.2	0
		1087.15	0
		1088.1	0
		1089.05	0
		1090	0
		1090.95	0
		1091.9	0
		1092.85	0
		1093.8	0
		1094.75	0
		1095.7	0
		1096.65	0
		1097.6	0
		1098.55	0
		1099.5	0
		1100.45	0
		1101.4	0
		1102.35	0
		1103.3	0
		1104.25	0
		1105.2	0
		1106.15	0
		1107.1	0
		1108.05	0
		1109	0
		1109.95	0
		1110.9	0
		1111.85	0
		1112.8	0
		1113.75	0
		1114.7	0
		1115.65	0
		1116.6	0
		1117.55	0
		1118.5	0
		1119.45	0
		1120.4	0
		1121.35	0
		1122.3	0
		1123.25	0
		1124.2	0
		1125.15	0
		1126.1	0
		1127.05	0
		1128	0
		1128.95	0
		1129.9	0
		1130.85	0
		1131.8	0
		1132.75	0
		1133.7	0
		1134.65	0
		1135.6	0
		1136.55	0
		1137.5	0
		1138.45	0
		1139.4	0
		1140.35	0
		1141.3	0
		1142.25	0
		1143.2	0
		1144.15	0
		1145.1	0
		1146.05	0
		1147	0
		1147.95	0
		1148.9	0
		1149.85	0
		1150.8	0
		1151.75	0
		1152.7	0
		1153.65	0
		1154.6	0
		1155.55	0
		1156.5	0
		1157.45	0
		1158.4	0
		1159.35	0
		1160.3	0
		1161.25	0
		1162.2	0
		1163.15	0
		1164.1	0
		1165.05	0
		1166	0
		1166.95	0
		1167.9	0
		1168.85	0
		1169.8	0
		1170.75	0
		1171.7	0
		1172.65	0
		1173.6	0
		1174.55	0
		1175.5	0
		1176.45	0
		1177.4	0
		1178.35	0
		1179.3	0
		1180.25	0
		1181.2	0
		1182.15	0
		1183.1	0
		1184.05	0
		1185	0
		1185.95	0
		1186.9	0
		1187.85	0
		1188.8	0
		1189.75	0
		1190.7	0
		1191.65	0
		1192.6	0
		1193.55	0
		1194.5	0
		1195.45	0
		1196.4	0
		1197.35	0
		1198.3	0
		1199.25	0
		1200.2	0
		1201.15	0
		1202.1	0
		1203.05	0
		1204	0
		1204.95	0
		1205.9	0
		1206.85	0
		1207.8	0
		1208.75	0
		1209.7	0
		1210.65	0
		1211.6	0
		1212.55	0
		1213.5	0
		1214.45	0
		1215.4	0
		1216.35	0
		1217.3	0
		1218.25	0
		1219.2	0
		1220.15	0
		1221.1	0
		1222.05	0
		1223	0
		1223.95	0
		1224.9	0
		1225.85	0
		1226.8	0
		1227.75	0
		1228.7	0
		1229.65	0
		1230.6	0
		1231.55	0
		1232.5	0
		1233.45	0
		1234.4	0
		1235.35	0
		1236.3	0
		1237.25	0
		1238.2	0
		1239.15	0
		1240.1	0
		1241.05	0
		1242	0
		1242.95	0
		1243.9	0
		1244.85	0
		1245.8	0
		1246.75	0
		1247.7	0
		1248.65	0
		1249.6	0
		1250.55	4.99314e-08
		1251.5	5.23703e-08
		1252.45	5.4921e-08
		1253.4	5.7588e-08
		1254.35	6.03765e-08
		1255.3	6.32914e-08
		1256.25	6.6338e-08
		1257.2	6.9522e-08
		1258.15	7.28489e-08
		1259.1	7.63247e-08
		1260.05	7.99556e-08
		1261	8.37479e-08
		1261.95	8.77082e-08
		1262.9	9.18434e-08
		1263.85	9.61605e-08
		1264.8	1.00667e-07
		1265.75	1.0537e-07
		1266.7	1.10279e-07
		1267.65	1.154e-07
		1268.6	1.20743e-07
		1269.55	1.26316e-07
		1270.5	1.32129e-07
		1271.45	1.3819e-07
		1272.4	1.4451e-07
		1273.35	1.51099e-07
		1274.3	1.57967e-07
		1275.25	1.65124e-07
		1276.2	1.72583e-07
		1277.15	1.80354e-07
		1278.1	1.8845e-07
		1279.05	1.96882e-07
		1280	2.05664e-07
		1280.95	2.14809e-07
		1281.9	2.2433e-07
		1282.85	2.34241e-07
		1283.8	2.44557e-07
		1284.75	2.55293e-07
		1285.7	2.66465e-07
		1286.65	2.78087e-07
		1287.6	2.90178e-07
		1288.55	3.02753e-07
		1289.5	3.15831e-07
		1290.45	3.29429e-07
		1291.4	3.43566e-07
		1292.35	3.58261e-07
		1293.3	3.73534e-07
		1294.25	3.89406e-07
		1295.2	4.05898e-07
		1296.15	4.23031e-07
		1297.1	4.40828e-07
		1298.05	4.59311e-07
		1299	4.78504e-07
		1299.95	4.98433e-07
		1300.9	5.19121e-07
		1301.85	5.40595e-07
		1302.8	5.62881e-07
		1303.75	5.86007e-07
		1304.7	6.10001e-07
		1305.65	6.34891e-07
		1306.6	6.60707e-07
		1307.55	6.87481e-07
		1308.5	7.15243e-07
		1309.45	7.44025e-07
		1310.4	7.73862e-07
		1311.35	8.04786e-07
		1312.3	8.36833e-07
		1313.25	8.70038e-07
		1314.2	9.04439e-07
		1315.15	9.40073e-07
		1316.1	9.7698e-07
		1317.05	1.0152e-06
		1318	1.05477e-06
		1318.95	1.09573e-06
		1319.9	1.13814e-06
		1320.85	1.18202e-06
		1321.8	1.22743e-06
		1322.75	1.27441e-06
		1323.7	1.32301e-06
		1324.65	1.37328e-06
		1325.6	1.42527e-06
		1326.55	1.47903e-06
		1327.5	1.5346e-06
		1328.45	1.59205e-06
		1329.4	1.65143e-06
		1330.35	1.71279e-06
		1331.3	1.77619e-06
		1332.25	1.84169e-06
		1333.2	1.90935e-06
		1334.15	1.97922e-06
		1335.1	2.05138e-06
		1336.05	2.12588e-06
		1337	2.20278e-06
		1337.95	2.28216e-06
		1338.9	2.36408e-06
		1339.85	2.44862e-06
		1340.8	2.53583e-06
		1341.75	2.62579e-06
		1342.7	2.71858e-06
		1343.65	2.81426e-06
		1344.6	2.91293e-06
		1345.55	3.01464e-06
		1346.5	3.11948e-06
		1347.45	3.22754e-06
		1348.4	3.33888e-06
		1349.35	3.4536e-06
		1350.3	3.57178e-06
		1351.25	3.69351e-06
		1352.2	3.81886e-06
		1353.15	3.94794e-06
		1354.1	4.08084e-06
		1355.05	4.21763e-06
		1356	4.35842e-06
		1356.95	4.50331e-06
		1357.9	4.65238e-06
		1358.85	4.80573e-06
		1359.8	4.96348e-06
		1360.75	5.12571e-06
		1361.7	5.29252e-06
		1362.65	5.46403e-06
		1363.6	5.64033e-06
		1364.55	5.82154e-06
		1365.5	6.00775e-06
		1366.45	6.19909e-06
		1367.4	6.39565e-06
		1368.35	6.59756e-06
		1369.3	6.80492e-06
		1370.25	7.01785e-06
		1371.2	7.23647e-06
		1372.15	7.46089e-06
		1373.1	7.69123e-06
		1374.05	7.92761e-06
		1375	8.17016e-06
		1375.95	8.41898e-06
		1376.9	8.67422e-06
		1377.85	8.93598e-06
		1378.8	9.20441e-06
		1379.75	9.47961e-06
		1380.7	9.76173e-06
		1381.65	1.00509e-05
		1382.6	1.03472e-05
		1383.55	1.06508e-05
		1384.5	1.09619e-05
		1385.45	1.12805e-05
		1386.4	1.16068e-05
		1387.35	1.19409e-05
		1388.3	1.2283e-05
		1389.25	1.26332e-05
		1390.2	1.29916e-05
		1391.15	1.33584e-05
		1392.1	1.37336e-05
		1393.05	1.41176e-05
		1394	1.45102e-05
		1394.95	1.49118e-05
		1395.9	1.53225e-05
		1396.85	1.57423e-05
		1397.8	1.61714e-05
		1398.75	1.661e-05
		1399.7	1.70582e-05
		1400.65	1.75162e-05
		1401.6	1.79839e-05
		1402.55	1.84617e-05
		1403.5	1.89496e-05
		1404.45	1.94478e-05
		1405.4	1.99564e-05
		1406.35	2.04755e-05
		1407.3	2.10053e-05
		1408.25	2.15459e-05
		1409.2	2.20974e-05
		1410.15	2.266e-05
		1411.1	2.32338e-05
		1412.05	2.38188e-05
		1413	2.44153e-05
		1413.95	2.50234e-05
		1414.9	2.56431e-05
		1415.85	2.62747e-05
		1416.8	2.69182e-05
		1417.75	2.75737e-05
		1418.7	2.82413e-05
		1419.65	2.89212e-05
		1420.6	2.96135e-05
		1421.55	3.03183e-05
		1422.5	3.10356e-05
		1423.45	3.17656e-05
		1424.4	3.25084e-05
		1425.35	3.32641e-05
		1426.3	3.40328e-05
		1427.25	3.48145e-05
		1428.2	3.56094e-05
		1429.15	3.64174e-05
		1430.1	3.72389e-05
		1431.05	3.80736e-05
		1432	3.89219e-05
		1432.95	3.97837e-05
		1433.9	4.0659e-05
		1434.85	4.1548e-05
		1435.8	4.24507e-05
		1436.75	4.33672e-05
		1437.7	4.42975e-05
		1438.65	4.52416e-05
		1439.6	4.61996e-05
		1440.55	4.71715e-05
		1441.5	4.81574e-05
		1442.45	4.91572e-05
		1443.4	5.01711e-05
		1444.35	5.11989e-05
		1445.3	5.22407e-05
		1446.25	5.32965e-05
		1447.2	5.43663e-05
		1448.15	5.54501e-05
		1449.1	5.65479e-05
		1450.05	5.76596e-05
		1451	5.87852e-05
		1451.95	5.99248e-05
		1452.9	6.10781e-05
		1453.85	6.22453e-05
		1454.8	6.34262e-05
		1455.75	6.46207e-05
		1456.7	6.58289e-05
		1457.65	6.70506e-05
		1458.6	6.82858e-05
		1459.55	6.95343e-05
		1460.5	7.07961e-05
		1461.45	7.20711e-05
		1462.4	7.33591e-05
		1463.35	7.466e-05
		1464.3	7.59738e-05
		1465.25	7.73002e-05
		1466.2	7.86392e-05
		1467.15	7.99906e-05
		1468.1	8.13542e-05
		1469.05	8.27299e-05
		1470	8.41175e-05
		1470.95	8.55168e-05
		1471.9	8.69276e-05
		1472.85	8.83498e-05
		1473.8	8.97832e-05
		1474.75	9.12275e-05
		1475.7	9.26824e-05
		1476.65	9.41479e-05
		1477.6	9.56237e-05
		1478.55	9.71094e-05
		1479.5	9.8605e-05
		1480.45	0.00010011
		1481.4	0.000101624
		1482.35	0.000103148
		1483.3	0.00010468
		1484.25	0.00010622
		1485.2	0.000107768
		1486.15	0.000109325
		1487.1	0.000110889
		1488.05	0.00011246
		1489	0.000114037
		1489.95	0.000115622
		1490.9	0.000117212
		1491.85	0.000118809
		1492.8	0.000120411
		1493.75	0.000122018
		1494.7	0.000123629
		1495.65	0.000125246
		1496.6	0.000126866
		1497.55	0.000128489
		1498.5	0.000130116
		1499.45	0.000131746
		1500.4	0.000133378
		1501.35	0.000135012
		1502.3	0.000136648
		1503.25	0.000138285
		1504.2	0.000139922
		1505.15	0.00014156
		1506.1	0.000143198
		1507.05	0.000144835
		1508	0.000146471
		1508.95	0.000148106
		1509.9	0.000149738
		1510.85	0.000151368
		1511.8	0.000152995
		1512.75	0.000154619
		1513.7	0.000156239
		1514.65	0.000157854
		1515.6	0.000159465
		1516.55	0.000161071
		1517.5	0.00016267
		1518.45	0.000164263
		1519.4	0.00016585
		1520.35	0.000167429
		1521.3	0.000169001
		1522.25	0.000170564
		1523.2	0.000172118
		1524.15	0.000173663
		1525.1	0.000175199
		1526.05	0.000176724
		1527	0.000178238
		1527.95	0.000179741
		1528.9	0.000181232
		1529.85	0.000182711
		1530.8	0.000184177
		1531.75	0.000185629
		1532.7	0.000187068
		1533.65	0.000188493
		1534.6	0.000189903
		1535.55	0.000191297
		1536.5	0.000192676
		1537.45	0.000194038
		1538.4	0.000195384
		1539.35	0.000196713
		1540.3	0.000198023
		1541.25	0.000199316
		1542.2	0.00020059
		1543.15	0.000201845
		1544.1	0.00020308
		1545.05	0.000204295
		1546	0.00020549
		1546.95	0.000206664
		1547.9	0.000207816
		1548.85	0.000208947
		1549.8	0.000210056
		1550.75	0.000211142
		1551.7	0.000212204
		1552.65	0.000213244
		1553.6	0.000214259
		1554.55	0.000215251
		1555.5	0.000216217
		1556.45	0.000217159
		1557.4	0.000218075
		1558.35	0.000218966
		1559.3	0.000219831
		1560.25	0.000220669
		1561.2	0.00022148
		1562.15	0.000222265
		1563.1	0.000223022
		1564.05	0.000223751
		1565	0.000224453
		1565.95	0.000225126
		1566.9	0.000225771
		1567.85	0.000226388
		1568.8	0.000226975
		1569.75	0.000227533
		1570.7	0.000228061
		1571.65	0.00022856
		1572.6	0.00022903
		1573.55	0.000229469
		1574.5	0.000229878
		1575.45	0.000230256
		1576.4	0.000230604
		1577.35	0.000230922
		1578.3	0.000231208
		1579.25	0.000231464
		1580.2	0.000231688
		1581.15	0.000231882
		1582.1	0.000232044
		1583.05	0.000232176
		1584	0.000232276
		1584.95	0.000232344
		1585.9	0.000232381
		1586.85	0.000232387
		1587.8	0.000232362
		1588.75	0.000232305
		1589.7	0.000232216
		1590.65	0.000232097
		1591.6	0.000231946
		1592.55	0.000231764
		1593.5	0.000231551
		1594.45	0.000231307
		1595.4	0.000231031
		1596.35	0.000230725
		1597.3	0.000230389
		1598.25	0.000230022
		1599.2	0.000229624
		1600.15	0.000229196
		1601.1	0.000228738
		1602.05	0.00022825
		1603	0.000227732
		1603.95	0.000227185
		1604.9	0.000226609
		1605.85	0.000226003
		1606.8	0.000225369
		1607.75	0.000224706
		1608.7	0.000224015
		1609.65	0.000223296
		1610.6	0.000222549
		1611.55	0.000221774
		1612.5	0.000220973
		1613.45	0.000220145
		1614.4	0.00021929
		1615.35	0.000218409
		1616.3	0.000217502
		1617.25	0.000216569
		1618.2	0.000215612
		1619.15	0.00021463
		1620.1	0.000213623
		1621.05	0.000212593
		1622	0.000211538
		1622.95	0.000210461
		1623.9	0.000209361
		1624.85	0.000208238
		1625.8	0.000207094
		1626.75	0.000205928
		1627.7	0.000204741
		1628.65	0.000203533
		1629.6	0.000202305
		1630.55	0.000201058
		1631.5	0.000199791
		1632.45	0.000198505
		1633.4	0.000197201
		1634.35	0.000195879
		1635.3	0.00019454
		1636.25	0.000193183
		1637.2	0.00019181
		1638.15	0.000190422
		1639.1	0.000189017
		1640.05	0.000187598
		1641	0.000186165
		1641.95	0.000184717
		1642.9	0.000183256
		1643.85	0.000181782
		1644.8	0.000180295
		1645.75	0.000178797
		1646.7	0.000177286
		1647.65	0.000175765
		1648.6	0.000174234
		1649.55	0.000172692
		1650.5	0.000171141
		1651.45	0.000169581
		1652.4	0.000168013
		1653.35	0.000166437
		1654.3	0.000164853
		1655.25	0.000163262
		1656.2	0.000161665
		1657.15	0.000160061
		1658.1	0.000158452
		1659.05	0.000156839
		1660	0.00015522
		1660.95	0.000153598
		1661.9	0.000151972
		1662.85	0.000150343
		1663.8	0.000148711
		1664.75	0.000147077
		1665.7	0.000145442
		1666.65	0.000143805
		1667.6	0.000142168
		1668.55	0.00014053
		1669.5	0.000138892
		1670.45	0.000137255
		1671.4	0.000135619
		1672.35	0.000133984
		1673.3	0.000132351
		1674.25	0.00013072
		1675.2	0.000129092
		1676.15	0.000127467
		1677.1	0.000125846
		1678.05	0.000124228
		1679	0.000122615
		1679.95	0.000121006
		1680.9	0.000119402
		1681.85	0.000117804
		1682.8	0.000116211
		1683.75	0.000114624
		1684.7	0.000113044
		1685.65	0.00011147
		1686.6	0.000109904
		1687.55	0.000108345
		1688.5	0.000106793
		1689.45	0.00010525
		1690.4	0.000103715
		1691.35	0.000102188
		1692.3	0.000100671
		1693.25	9.91621e-05
		1694.2	9.7663e-05
		1695.15	9.61736e-05
		1696.1	9.46941e-05
		1697.05	9.32248e-05
		1698	9.17659e-05
		1698.95	9.03176e-05
		1699.9	8.88802e-05
		1700.85	8.74538e-05
		1701.8	8.60387e-05
		1702.75	8.46351e-05
		1703.7	8.32431e-05
		1704.65	8.1863e-05
		1705.6	8.04949e-05
		1706.55	7.9139e-05
		1707.5	7.77954e-05
		1708.45	7.64643e-05
		1709.4	7.51458e-05
		1710.35	7.38401e-05
		1711.3	7.25473e-05
		1712.25	7.12674e-05
		1713.2	7.00007e-05
		1714.15	6.87473e-05
		1715.1	6.75072e-05
		1716.05	6.62804e-05
		1717	6.51158e-05
		1717.95	6.39173e-05
		1718.9	6.27326e-05
		1719.85	6.15616e-05
		1720.8	6.04044e-05
		1721.75	5.92611e-05
		1722.7	5.81317e-05
		1723.65	5.70162e-05
		1724.6	5.59146e-05
		1725.55	5.48271e-05
		1726.5	5.37536e-05
		1727.45	5.26941e-05
		1728.4	5.16486e-05
		1729.35	5.06172e-05
		1730.3	4.95998e-05
		1731.25	4.85964e-05
		1732.2	4.76071e-05
		1733.15	4.66317e-05
		1734.1	4.56703e-05
		1735.05	4.47229e-05
		1736	4.37893e-05
		1736.95	4.28696e-05
		1737.9	4.19637e-05
		1738.85	4.10716e-05
		1739.8	4.01932e-05
		1740.75	3.93285e-05
		1741.7	3.84773e-05
		1742.65	3.76397e-05
		1743.6	3.68156e-05
		1744.55	3.60048e-05
		1745.5	3.52074e-05
		1746.45	3.44231e-05
		1747.4	3.36521e-05
		1748.35	3.2894e-05
		1749.3	3.2149e-05
		1750.25	3.14168e-05
		1751.2	3.06974e-05
		1752.15	2.99907e-05
		1753.1	2.92965e-05
		1754.05	2.86148e-05
		1755	2.79455e-05
		1755.95	2.72884e-05
		1756.9	2.66435e-05
		1757.85	2.60106e-05
		1758.8	2.53896e-05
		1759.75	2.47804e-05
		1760.7	2.41828e-05
		1761.65	2.35969e-05
		1762.6	2.30223e-05
		1763.55	2.24591e-05
		1764.5	2.1907e-05
		1765.45	2.1366e-05
		1766.4	2.08359e-05
		1767.35	2.03166e-05
		1768.3	1.98079e-05
		1769.25	1.93098e-05
		1770.2	1.88221e-05
		1771.15	1.83447e-05
		1772.1	1.78774e-05
		1773.05	1.74201e-05
		1774	1.69727e-05
		1774.95	1.65349e-05
		1775.9	1.61068e-05
		1776.85	1.56882e-05
		1777.8	1.52789e-05
		1778.75	1.48788e-05
		1779.7	1.44877e-05
		1780.65	1.41056e-05
		1781.6	1.37322e-05
		1782.55	1.33675e-05
		1783.5	1.30114e-05
		1784.45	1.26636e-05
		1785.4	1.23241e-05
		1786.35	1.19927e-05
		1787.3	1.16692e-05
		1788.25	1.13537e-05
		1789.2	1.10459e-05
		1790.15	1.07456e-05
		1791.1	1.04529e-05
		1792.05	1.01674e-05
		1793	9.88923e-06
		1793.95	9.61811e-06
		1794.9	9.35395e-06
		1795.85	9.09663e-06
		1796.8	8.84602e-06
		1797.75	8.602e-06
		1798.7	8.36445e-06
		1799.65	8.13326e-06
		1800.6	7.90829e-06
		1801.55	7.68944e-06
		1802.5	7.47659e-06
		1803.45	7.26962e-06
		1804.4	7.06842e-06
		1805.35	6.87287e-06
		1806.3	6.68287e-06
		1807.25	6.49831e-06
		1808.2	6.31908e-06
		1809.15	6.14506e-06
		1810.1	5.97616e-06
		1811.05	5.81227e-06
		1812	5.65329e-06
		1812.95	5.49912e-06
		1813.9	5.34966e-06
		1814.85	5.20481e-06
		1815.8	5.06447e-06
		1816.75	4.92855e-06
		1817.7	4.79695e-06
		1818.65	4.66959e-06
		1819.6	4.54637e-06
		1820.55	4.42721e-06
		1821.5	4.312e-06
		1822.45	4.20068e-06
		1823.4	4.09316e-06
		1824.35	3.98935e-06
		1825.3	3.88916e-06
		1826.25	3.79253e-06
		1827.2	3.69938e-06
		1828.15	3.60961e-06
		1829.1	3.52317e-06
		1830.05	3.43998e-06
		1831	3.35996e-06
		1831.95	3.28304e-06
		1832.9	3.20916e-06
		1833.85	3.13824e-06
		1834.8	3.07022e-06
		1835.75	3.00504e-06
		1836.7	2.94263e-06
		1837.65	2.88292e-06
		1838.6	2.82587e-06
		1839.55	2.7714e-06
		1840.5	2.71946e-06
		1841.45	2.66999e-06
		1842.4	2.62294e-06
		1843.35	2.57826e-06
		1844.3	2.53589e-06
		1845.25	2.49577e-06
		1846.2	2.45787e-06
		1847.15	2.42213e-06
		1848.1	2.3885e-06
		1849.05	2.35694e-06
		1850	2.3274e-06
		1850.95	2.29984e-06
		1851.9	2.27421e-06
		1852.85	2.25048e-06
		1853.8	2.2286e-06
		1854.75	2.20854e-06
		1855.7	2.19025e-06
		1856.65	2.1737e-06
		1857.6	2.15886e-06
		1858.55	2.14569e-06
		1859.5	2.13415e-06
		1860.45	2.12421e-06
		1861.4	2.11585e-06
		1862.35	2.10903e-06
		1863.3	2.10372e-06
		1864.25	2.09989e-06
		1865.2	2.09752e-06
		1866.15	2.09657e-06
		1867.1	2.09703e-06
		1868.05	2.09886e-06
		1869	2.10205e-06
		1869.95	2.10657e-06
		1870.9	2.1124e-06
		1871.85	2.11952e-06
		1872.8	2.12791e-06
		1873.75	2.13754e-06
		1874.7	2.1484e-06
		1875.65	2.16047e-06
		1876.6	2.17373e-06
		1877.55	2.18817e-06
		1878.5	2.20377e-06
		1879.45	2.22051e-06
		1880.4	2.23839e-06
		1881.35	2.25738e-06
		1882.3	2.27747e-06
		1883.25	2.29866e-06
		1884.2	2.32093e-06
		1885.15	2.34427e-06
		1886.1	2.36866e-06
		1887.05	2.39411e-06
		1888	2.42059e-06
		1888.95	2.4481e-06
		1889.9	2.47664e-06
		1890.85	2.50618e-06
		1891.8	2.53674e-06
		1892.75	2.5683e-06
		1893.7	2.60085e-06
		1894.65	2.63439e-06
		1895.6	2.66892e-06
		1896.55	2.70443e-06
		1897.5	2.74091e-06
		1898.45	2.77836e-06
		1899.4	2.81679e-06
		1900.35	2.85618e-06
		1901.3	2.89653e-06
		1902.25	2.93784e-06
		1903.2	2.98012e-06
		1904.15	3.02336e-06
		1905.1	3.06755e-06
		1906.05	3.1127e-06
		1907	3.15881e-06
		1907.95	3.20588e-06
		1908.9	3.25391e-06
		1909.85	3.3029e-06
		1910.8	3.35286e-06
		1911.75	3.40377e-06
		1912.7	3.45565e-06
		1913.65	3.5085e-06
		1914.6	3.56232e-06
		1915.55	3.61712e-06
		1916.5	3.67289e-06
		1917.45	3.72964e-06
		1918.4	3.78738e-06
		1919.35	3.8461e-06
		1920.3	3.90582e-06
		1921.25	3.96653e-06
		1922.2	4.02825e-06
		1923.15	4.09097e-06
		1924.1	4.10852e-06
		1925.05	4.17544e-06
		1926	4.24328e-06
		1926.95	4.31206e-06
		1927.9	4.38179e-06
		1928.85	4.45248e-06
		1929.8	4.52413e-06
		1930.75	4.59676e-06
		1931.7	4.67037e-06
		1932.65	4.74498e-06
		1933.6	4.8206e-06
		1934.55	4.89723e-06
		1935.5	4.9749e-06
		1936.45	5.0536e-06
		1937.4	5.13334e-06
		1938.35	5.21415e-06
		1939.3	5.29602e-06
		1940.25	5.37898e-06
		1941.2	5.46302e-06
		1942.15	5.54816e-06
		1943.1	5.63442e-06
		1944.05	5.72179e-06
		1945	5.8103e-06
		1945.95	5.89995e-06
		1946.9	5.99075e-06
		1947.85	6.08271e-06
		1948.8	6.17585e-06
		1949.75	6.27018e-06
		1950.7	6.3657e-06
		1951.65	6.46243e-06
		1952.6	6.56038e-06
		1953.55	6.65956e-06
		1954.5	6.75997e-06
		1955.45	6.86164e-06
		1956.4	6.96456e-06
		1957.35	7.06877e-06
		1958.3	7.17425e-06
		1959.25	7.28103e-06
		1960.2	7.38911e-06
		1961.15	7.49851e-06
		1962.1	7.60924e-06
		1963.05	7.72131e-06
		1964	7.83472e-06
		1964.95	7.9495e-06
		1965.9	8.06565e-06
		1966.85	8.18318e-06
		1967.8	8.3021e-06
		1968.75	8.42243e-06
		1969.7	8.54418e-06
		1970.65	8.66735e-06
		1971.6	8.79196e-06
		1972.55	8.91802e-06
		1973.5	9.04554e-06
		1974.45	9.17453e-06
		1975.4	9.305e-06
		1976.35	9.43697e-06
		1977.3	9.57044e-06
		1978.25	9.70542e-06
		1979.2	9.84193e-06
		1980.15	9.97998e-06
		1981.1	1.01196e-05
		1982.05	1.02607e-05
		1983	1.04035e-05
		1983.95	1.05478e-05
		1984.9	1.06937e-05
		1985.85	1.08411e-05
		1986.8	1.09903e-05
		1987.75	1.1141e-05
		1988.7	1.12934e-05
		1989.65	1.14474e-05
		1990.6	1.1603e-05
		1991.55	1.17604e-05
		1992.5	1.19671e-05
		1993.45	1.21296e-05
		1994.4	1.2294e-05
		1995.35	1.24601e-05
		1996.3	1.26281e-05
		1997.25	1.27978e-05
		1998.2	1.29694e-05
		1999.15	1.31427e-05
		2000.1	1.3318e-05
		2001.05	1.34951e-05
		2002	1.3674e-05
		2002.95	1.38549e-05
		2003.9	1.40376e-05
		2004.85	1.42222e-05
		2005.8	1.44088e-05
		2006.75	1.45973e-05
		2007.7	1.47877e-05
		2008.65	1.49801e-05
		2009.6	1.51745e-05
		2010.55	1.53708e-05
		2011.5	1.55692e-05
		2012.45	1.57696e-05
		2013.4	1.59719e-05
		2014.35	1.61764e-05
		2015.3	1.63828e-05
		2016.25	1.65914e-05
		2017.2	1.6802e-05
		2018.15	1.70147e-05
		2019.1	1.72295e-05
		2020.05	1.74464e-05
		2021	1.76655e-05
		2021.95	1.78867e-05
		2022.9	1.811e-05
		2023.85	1.83355e-05
		2024.8	1.85632e-05
		2025.75	1.87931e-05
		2026.7	1.90252e-05
		2027.65	1.92595e-05
		2028.6	1.94961e-05
		2029.55	1.97349e-05
		2030.5	1.99759e-05
		2031.45	2.02193e-05
		2032.4	2.04649e-05
		2033.35	2.07128e-05
		2034.3	2.09631e-05
		2035.25	2.12156e-05
		2036.2	2.14705e-05
		2037.15	2.17754e-05
		2038.1	2.20378e-05
		2039.05	2.23026e-05
		2040	2.257e-05
		2040.95	2.284e-05
		2041.9	2.31125e-05
		2042.85	2.34378e-05
		2043.8	2.37183e-05
		2044.75	2.40017e-05
		2045.7	2.42878e-05
		2046.65	2.45768e-05
		2047.6	2.48687e-05
		2048.55	2.51636e-05
		2049.5	2.54614e-05
		2050.45	2.57621e-05
		2051.4	2.60659e-05
		2052.35	2.63728e-05
		2053.3	2.66827e-05
		2054.25	2.69958e-05
		2055.2	2.7312e-05
		2056.15	2.76808e-05
		2057.1	2.80067e-05
		2058.05	2.83361e-05
		2059	2.8669e-05
		2059.95	2.90055e-05
		2060.9	2.93457e-05
		2061.85	2.96896e-05
		2062.8	3.00373e-05
		2063.75	3.03888e-05
		2064.7	3.07442e-05
		2065.65	3.11036e-05
		2066.6	3.1467e-05
		2067.55	3.18346e-05
		2068.5	3.22063e-05
		2069.45	3.25823e-05
		2070.4	3.29627e-05
		2071.35	3.33474e-05
		2072.3	3.37367e-05
		2073.25	3.41306e-05
		2074.2	3.4577e-05
		2075.15	3.4983e-05
		2076.1	3.5394e-05
		2077.05	3.58102e-05
		2078	3.62316e-05
		2078.95	3.66583e-05
		2079.9	3.70906e-05
		2080.85	3.75284e-05
		2081.8	3.80198e-05
		2082.75	3.84719e-05
		2083.7	3.89302e-05
		2084.65	3.93947e-05
		2085.6	3.98657e-05
		2086.55	4.03433e-05
		2087.5	4.09255e-05
		2088.45	4.14231e-05
		2089.4	4.19281e-05
		2090.35	4.24408e-05
		2091.3	4.29614e-05
		2092.25	4.354e-05
		2093.2	4.40799e-05
		2094.15	4.46285e-05
		2095.1	4.51861e-05
		2096.05	4.58027e-05
		2097	4.63817e-05
		2097.95	4.69707e-05
		2098.9	4.75698e-05
		2099.85	4.82277e-05
		2100.8	4.88502e-05
		2101.75	4.94839e-05
		2102.7	5.01291e-05
		2103.65	5.07861e-05
		2104.6	5.14554e-05
		2105.55	5.21373e-05
		2106.5	5.28322e-05
		2107.45	5.35404e-05
		2108.4	5.42624e-05
		2109.35	5.49986e-05
		2110.3	5.57494e-05
		2111.25	5.65152e-05
		2112.2	5.72966e-05
		2113.15	5.8094e-05
		2114.1	5.89079e-05
		2115.05	5.97387e-05
		2116	6.05871e-05
		2116.95	6.14535e-05
		2117.9	6.23385e-05
		2118.85	6.32426e-05
		2119.8	6.41665e-05
		2120.75	6.51107e-05
		2121.7	6.60759e-05
		2122.65	6.70627e-05
		2123.6	6.80717e-05
		2124.55	6.91037e-05
		2125.5	7.01593e-05
		2126.45	7.12392e-05
		2127.4	7.23441e-05
		2128.35	7.34749e-05
		2129.3	7.46322e-05
		2130.25	7.5817e-05
		2131.2	7.70299e-05
		2132.15	7.8321e-05
		2133.1	7.96457e-05
		2134.05	8.09554e-05
		2135	8.22972e-05
		2135.95	8.36721e-05
		2136.9	8.50811e-05
		2137.85	8.65251e-05
		2138.8	8.80052e-05
		2139.75	8.95224e-05
		2140.7	9.10779e-05
		2141.65	9.26727e-05
		2142.6	9.4308e-05
		2143.55	9.59848e-05
		2144.5	9.77523e-05
		2145.45	9.95193e-05
		2146.4	0.000101381
		2147.35	0.000103244
		2148.3	0.000105156
		2149.25	0.000107117
		2150.2	0.000109129
		2151.15	0.000111194
		2152.1	0.000113313
		2153.05	0.000115488
		2154	0.000117719
		2154.95	0.00012001
		2155.9	0.00012236
		2156.85	0.000124772
		2157.8	0.000127248
		2158.75	0.000129839
		2159.7	0.00013245
		2160.65	0.00013513
		2161.6	0.00013788
		2162.55	0.000140703
		2163.5	0.0001436
		2164.45	0.000146573
		2165.4	0.000149625
		2166.35	0.000152757
		2167.3	0.000155971
		2168.25	0.000159269
		2169.2	0.000162654
		2170.15	0.000166127
		2171.1	0.000169691
		2172.05	0.000173347
		2173	0.000177099
		2173.95	0.000180948
		2174.9	0.000184897
		2175.85	0.000188948
		2176.8	0.000193103
		2177.75	0.000197366
		2178.7	0.000201737
		2179.65	0.00020622
		2180.6	0.000210817
		2181.55	0.000215532
		2182.5	0.000220414
		2183.45	0.000225374
		2184.4	0.000230458
		2185.35	0.00023567
		2186.3	0.000241013
		2187.25	0.000246489
		2188.2	0.0002521
		2189.15	0.000257851
		2190.1	0.000263743
		2191.05	0.00026978
		2192	0.000275964
		2192.95	0.000282298
		2193.9	0.000288786
		2194.85	0.00029543
		2195.8	0.000302234
		2196.75	0.0003092
		2197.7	0.000316332
		2198.65	0.000323632
		2199.6	0.000331104
		2200.55	0.000338751
		2201.5	0.000346575
		2202.45	0.000354581
		2203.4	0.000362772
		2204.35	0.000371149
		2205.3	0.000379718
		2206.25	0.000388481
		2207.2	0.000397441
		2208.15	0.000406601
		2209.1	0.000415965
		2210.05	0.000425536
		2211	0.000435317
		2211.95	0.000445312
		2212.9	0.000455523
		2213.85	0.000465955
		2214.8	0.000476609
		2215.75	0.00048749
		2216.7	0.000498601
		2217.65	0.000509945
		2218.6	0.000521524
		2219.55	0.000533343
		2220.5	0.000545455
		2221.45	0.000557766
		2222.4	0.000570326
		2223.35	0.000583138
		2224.3	0.000596205
		2225.25	0.000609531
		2226.2	0.000623118
		2227.15	0.000636969
		2228.1	0.000651087
		2229.05	0.000665475
		2230	0.000680137
		2230.95	0.000695074
		2231.9	0.000710289
		2232.85	0.000725786
		2233.8	0.000741567
		2234.75	0.000757634
		2235.7	0.00077399
		2236.65	0.000790686
		2237.6	0.000807631
		2238.55	0.000824873
		2239.5	0.000842413
		2240.45	0.000860253
		2241.4	0.000878397
		2242.35	0.000896845
		2243.3	0.0009156
		2244.25	0.000934663
		2245.2	0.000954037
		2246.15	0.000973722
		2247.1	0.00099372
		2248.05	0.00101403
		2249	0.00103466
		2249.95	0.00105561
		2250.9	0.00107687
		2251.85	0.00109845
		2252.8	0.00112036
		2253.75	0.00114258
		2254.7	0.00116512
		2255.65	0.00118798
		2256.6	0.00121117
		2257.55	0.00123467
		2258.5	0.0012585
		2259.45	0.00128265
		2260.4	0.00130712
		2261.35	0.00133191
		2262.3	0.00135701
		2263.25	0.00138244
		2264.2	0.00140818
		2265.15	0.00143424
		2266.1	0.00146061
		2267.05	0.00148729
		2268	0.00151428
		2268.95	0.00154159
		2269.9	0.00156919
		2270.85	0.00159711
		2271.8	0.00162532
		2272.75	0.00165383
		2273.7	0.00168264
		2274.65	0.00171174
		2275.6	0.00174112
		2276.55	0.00177079
		2277.5	0.00180074
		2278.45	0.00183097
		2279.4	0.00186147
		2280.35	0.00189224
		2281.3	0.00192327
		2282.25	0.00195456
		2283.2	0.0019861
		2284.15	0.00201788
		2285.1	0.00204991
		2286.05	0.00208217
		2287	0.00211466
		2287.95	0.00214738
		2288.9	0.00218031
		2289.85	0.00221345
		2290.8	0.00224679
		2291.75	0.00228032
		2292.7	0.00231404
		2293.65	0.00234794
		2294.6	0.00238201
		2295.55	0.00241625
		2296.5	0.00245063
		2297.45	0.00248517
		2298.4	0.00251984
		2299.35	0.00255464
		2300.3	0.00258955
		2301.25	0.00262458
		2302.2	0.00265971
		2303.15	0.00269492
		2304.1	0.00273021
		2305.05	0.00276557
		2306	0.00280099
		2306.95	0.00283646
		2307.9	0.00287197
		2308.85	0.0029075
		2309.8	0.00294304
		2310.75	0.00297859
		2311.7	0.00301413
		2312.65	0.00304966
		2313.6	0.00308515
		2314.55	0.00312059
		2315.5	0.00315598
		2316.45	0.00319131
		2317.4	0.00322655
		2318.35	0.0032617
		2319.3	0.00329675
		2320.25	0.00333168
		2321.2	0.00336649
		2322.15	0.00340115
		2323.1	0.00343565
		2324.05	0.00346999
		2325	0.00350415
		2325.95	0.00353811
		2326.9	0.00357187
		2327.85	0.00360541
		2328.8	0.00363872
		2329.75	0.00367179
		2330.7	0.0037046
		2331.65	0.00373714
		2332.6	0.00376939
		2333.55	0.00380135
		2334.5	0.003833
		2335.45	0.00386433
		2336.4	0.00389533
		2337.35	0.00392599
		2338.3	0.00395628
		2339.25	0.0039862
		2340.2	0.00401575
		2341.15	0.00404489
		2342.1	0.00407363
		2343.05	0.00410196
		2344	0.00412985
		2344.95	0.0041573
		2345.9	0.0041843
		2346.85	0.00421084
		2347.8	0.0042369
		2348.75	0.00426247
		2349.7	0.00428755
		2350.65	0.00431212
		2351.6	0.00433618
		2352.55	0.00435971
		2353.5	0.0043827
		2354.45	0.00440514
		2355.4	0.00442703
		2356.35	0.00444836
		2357.3	0.00446911
		2358.25	0.00448929
		2359.2	0.00450887
		2360.15	0.00452785
		2361.1	0.00454623
		2362.05	0.00456399
		2363	0.00458113
		2363.95	0.00459765
		2364.9	0.00461353
		2365.85	0.00462877
		2366.8	0.00464336
		2367.75	0.0046573
		2368.7	0.00467058
		2369.65	0.0046832
		2370.6	0.00469515
		2371.55	0.00470643
		2372.5	0.00471703
		2373.45	0.00472694
		2374.4	0.00473618
		2375.35	0.00474472
		2376.3	0.00475257
		2377.25	0.00475973
		2378.2	0.00476619
		2379.15	0.00477194
		2380.1	0.004777
		2381.05	0.00478136
		2382	0.00478501
		2382.95	0.00478795
		2383.9	0.00479019
		2384.85	0.00479172
		2385.8	0.00479254
		2386.75	0.00479265
		2387.7	0.00479206
		2388.65	0.00479077
		2389.6	0.00478876
		2390.55	0.00478606
		2391.5	0.00478265
		2392.45	0.00477854
		2393.4	0.00477373
		2394.35	0.00476823
		2395.3	0.00476203
		2396.25	0.00475514
		2397.2	0.00474756
		2398.15	0.0047393
		2399.1	0.00473036
		2400.05	0.00472074
		2401	0.00471045
		2401.95	0.00469949
		2402.9	0.00468787
		2403.85	0.00467559
		2404.8	0.00466265
		2405.75	0.00464907
		2406.7	0.00463484
		2407.65	0.00461998
		2408.6	0.00460448
		2409.55	0.00458836
		2410.5	0.00457162
		2411.45	0.00455427
		2412.4	0.00453632
		2413.35	0.00451777
		2414.3	0.00449862
		2415.25	0.00447889
		2416.2	0.00445859
		2417.15	0.00443772
		2418.1	0.00441629
		2419.05	0.00439431
		2420	0.00437178
		2420.95	0.00434873
		2421.9	0.00432514
		2422.85	0.00430104
		2423.8	0.00427643
		2424.75	0.00425132
		2425.7	0.00422573
		2426.65	0.00419965
		2427.6	0.0041731
		2428.55	0.0041461
		2429.5	0.00411864
		2430.45	0.00409075
		2431.4	0.00406242
		2432.35	0.00403368
		2433.3	0.00400453
		2434.25	0.00397498
		2435.2	0.00394504
		2436.15	0.00391473
		2437.1	0.00388405
		2438.05	0.00385302
		2439	0.00382165
		2439.95	0.00378995
		2440.9	0.00375793
		2441.85	0.0037256
		2442.8	0.00369297
		2443.75	0.00366006
		2444.7	0.00362687
		2445.65	0.00359343
		2446.6	0.00355973
		2447.55	0.0035258
		2448.5	0.00349164
		2449.45	0.00345727
		2450.4	0.0034227
		2451.35	0.00338794
		2452.3	0.00335301
		2453.25	0.00331791
		2454.2	0.00328266
		2455.15	0.00324726
		2456.1	0.00321174
		2457.05	0.0031761
		2458	0.00314036
		2458.95	0.00310453
		2459.9	0.00306862
		2460.85	0.00303264
		2461.8	0.00299661
		2462.75	0.00296053
		2463.7	0.00292442
		2464.65	0.00288829
		2465.6	0.00285215
		2466.55	0.00281602
		2467.5	0.0027799
		2468.45	0.00274381
		2469.4	0.00270776
		2470.35	0.00267176
		2471.3	0.00263581
		2472.25	0.00259994
		2473.2	0.00256416
		2474.15	0.00252846
		2475.1	0.00249287
		2476.05	0.00245739
		2477	0.00242204
		2477.95	0.00238682
		2478.9	0.00235175
		2479.85	0.00231683
		2480.8	0.00228208
		2481.75	0.0022475
		2482.7	0.0022131
		2483.65	0.0021789
		2484.6	0.00214489
		2485.55	0.00211109
		2486.5	0.00207751
		2487.45	0.00204416
		2488.4	0.00201104
		2489.35	0.00197816
		2490.3	0.00194553
		2491.25	0.00191316
		2492.2	0.00188105
		2493.15	0.0018492
		2494.1	0.00181764
		2495.05	0.00178635
		2496	0.00175536
		2496.95	0.00172465
		2497.9	0.00169425
		2498.85	0.00166415
		2499.8	0.00163436
		2500.75	0.00160489
		2501.7	0.00157573
		2502.65	0.0015469
		2503.6	0.00151839
		2504.55	0.00149022
		2505.5	0.00146237
		2506.45	0.00143487
		2507.4	0.0014077
		2508.35	0.00138088
		2509.3	0.0013544
		2510.25	0.00132827
		2511.2	0.00130249
		2512.15	0.00127705
		2513.1	0.00125197
		2514.05	0.00122724
		2515	0.00120287
		2515.95	0.00117885
		2516.9	0.00115519
		2517.85	0.00113188
		2518.8	0.00110893
		2519.75	0.00108633
		2520.7	0.00106409
		2521.65	0.0010422
		2522.6	0.00102066
		2523.55	0.000999481
		2524.5	0.00097865
		2525.45	0.000958168
		2526.4	0.000938036
		2527.35	0.00091825
		2528.3	0.000898809
		2529.25	0.000879711
		2530.2	0.000860953
		2531.15	0.000842534
		2532.1	0.00082445
		2533.05	0.0008067
		2534	0.00078928
		2534.95	0.000772188
		2535.9	0.00075542
		2536.85	0.000738973
		2537.8	0.000722845
		2538.75	0.000707031
		2539.7	0.000691529
		2540.65	0.000676334
		2541.6	0.000661444
		2542.55	0.000646855
		2543.5	0.000632562
		2544.45	0.000618562
		2545.4	0.000604851
		2546.35	0.000591425
		2547.3	0.000578281
		2548.25	0.000565414
		2549.2	0.000552819
		2550.15	0.000540494
		2551.1	0.000528433
		2552.05	0.000516632
		2553	0.000505088
		2553.95	0.000493797
		2554.9	0.000482753
		2555.85	0.000471952
		2556.8	0.000461391
		2557.75	0.000451066
		2558.7	0.000440971
		2559.65	0.000431103
		2560.6	0.000421457
		2561.55	0.000412029
		2562.5	0.000402816
		2563.45	0.000393813
		2564.4	0.000385015
		2565.35	0.000376419
		2566.3	0.000368021
		2567.25	0.000359816
		2568.2	0.0003518
		2569.15	0.000343971
		2570.1	0.000336322
		2571.05	0.000328852
		2572	0.000321555
		2572.95	0.000314429
		2573.9	0.000307468
		2574.85	0.000300671
		2575.8	0.000294032
		2576.75	0.000287549
		2577.7	0.000281217
		2578.65	0.000275034
		2579.6	0.00026895
		2580.55	0.000263056
		2581.5	0.000257301
		2582.45	0.00025168
		2583.4	0.000246144
		2584.35	0.000240786
		2585.3	0.000235553
		2586.25	0.000230441
		2587.2	0.000225449
		2588.15	0.000220573
		2589.1	0.00021581
		2590.05	0.000211158
		2591	0.000206614
		2591.95	0.000202174
		2592.9	0.000197838
		2593.85	0.000193601
		2594.8	0.000189462
		2595.75	0.000185418
		2596.7	0.000181466
		2597.65	0.000177605
		2598.6	0.000173786
		2599.55	0.000170102
		2600.5	0.000166501
		2601.45	0.000162981
		2602.4	0.000159541
		2603.35	0.000156178
		2604.3	0.000152891
		2605.25	0.000149632
		2606.2	0.000146492
		2607.15	0.000143423
		2608.1	0.000140421
		2609.05	0.000137485
		2610	0.000134614
		2610.95	0.000131806
		2611.9	0.000129059
		2612.85	0.000126372
		2613.8	0.000123743
		2614.75	0.000121171
		2615.7	0.000118655
		2616.65	0.000116192
		2617.6	0.000113783
		2618.55	0.000111425
		2619.5	0.000109117
		2620.45	0.000106858
		2621.4	0.000104647
		2622.35	0.000102436
		2623.3	0.000100321
		2624.25	9.82495e-05
		2625.2	9.62214e-05
		2626.15	9.42355e-05
		2627.1	9.22907e-05
		2628.05	9.03862e-05
		2629	8.85209e-05
		2629.95	8.66939e-05
		2630.9	8.49045e-05
		2631.85	8.31516e-05
		2632.8	8.14346e-05
		2633.75	7.97067e-05
		2634.7	7.80613e-05
		2635.65	7.64492e-05
		2636.6	7.48696e-05
		2637.55	7.33219e-05
		2638.5	7.18054e-05
		2639.45	7.03193e-05
		2640.4	6.8863e-05
		2641.35	6.74359e-05
		2642.3	6.60373e-05
		2643.25	6.46666e-05
		2644.2	6.33233e-05
		2645.15	6.20067e-05
		2646.1	6.06696e-05
		2647.05	5.94076e-05
		2648	5.81705e-05
		2648.95	5.69579e-05
		2649.9	5.57693e-05
		2650.85	5.46041e-05
		2651.8	5.34167e-05
		2652.75	5.22994e-05
		2653.7	5.12041e-05
		2654.65	5.00834e-05
		2655.6	4.90336e-05
		2656.55	4.80044e-05
		2657.5	4.69953e-05
		2658.45	4.6006e-05
		2659.4	4.49891e-05
		2660.35	4.40418e-05
		2661.3	4.30673e-05
		2662.25	4.21592e-05
		2663.2	4.12687e-05
		2664.15	4.03954e-05
		2665.1	3.95391e-05
		2666.05	3.86537e-05
		2667	3.78336e-05
		2667.95	3.70294e-05
		2668.9	3.62407e-05
		2669.85	3.54673e-05
		2670.8	3.47088e-05
		2671.75	3.39189e-05
		2672.7	3.31458e-05
		2673.65	3.24359e-05
		2674.6	3.17396e-05
		2675.55	3.10569e-05
		2676.5	3.03876e-05
		2677.45	2.97312e-05
		2678.4	2.90878e-05
		2679.35	2.84569e-05
		2680.3	2.78385e-05
		2681.25	2.72323e-05
		2682.2	2.66382e-05
		2683.15	2.60558e-05
		2684.1	2.5485e-05
		2685.05	2.49256e-05
		2686	2.43774e-05
		2686.95	2.3795e-05
		2687.9	2.3271e-05
		2688.85	2.27575e-05
		2689.8	2.22544e-05
		2690.75	2.17614e-05
		2691.7	2.12784e-05
		2692.65	2.08052e-05
		2693.6	2.03416e-05
		2694.55	1.98875e-05
		2695.5	1.94427e-05
		2696.45	1.9007e-05
		2697.4	1.85803e-05
		2698.35	1.81624e-05
		2699.3	1.77532e-05
		2700.25	1.73524e-05
		2701.2	1.69601e-05
		2702.15	1.65759e-05
		2703.1	1.61543e-05
		2704.05	1.57885e-05
		2705	1.54303e-05
		2705.95	1.50796e-05
		2706.9	1.47363e-05
		2707.85	1.44002e-05
		2708.8	1.40712e-05
		2709.75	1.37492e-05
		2710.7	1.3434e-05
		2711.65	1.31256e-05
		2712.6	1.28237e-05
		2713.55	1.25284e-05
		2714.5	1.22393e-05
		2715.45	1.19565e-05
		2716.4	1.16799e-05
		2717.35	1.14092e-05
		2718.3	1.11444e-05
		2719.25	1.08854e-05
		2720.2	1.0632e-05
		2721.15	1.0339e-05
		2722.1	1.00992e-05
		2723.05	9.86464e-06
		2724	9.63517e-06
		2724.95	9.41071e-06
		2725.9	9.19115e-06
		2726.85	8.97642e-06
		2727.8	8.76641e-06
		2728.75	8.56104e-06
		2729.7	8.36022e-06
		2730.65	8.16385e-06
		2731.6	7.97185e-06
		2732.55	7.78414e-06
		2733.5	7.60063e-06
		2734.45	7.42124e-06
		2735.4	7.24588e-06
		2736.35	7.07448e-06
		2737.3	6.90695e-06
		2738.25	6.74322e-06
		2739.2	6.58321e-06
		2740.15	6.42684e-06
		2741.1	6.27404e-06
		2742.05	6.12473e-06
		2743	5.97885e-06
		2743.95	5.83633e-06
		2744.9	5.69708e-06
		2745.85	5.56105e-06
		2746.8	5.42816e-06
		2747.75	5.29835e-06
		2748.7	5.17156e-06
		2749.65	5.04771e-06
		2750.6	4.92676e-06
		2751.55	4.80862e-06
		2752.5	4.69325e-06
		2753.45	4.58059e-06
		2754.4	4.47057e-06
		2755.35	4.36314e-06
		2756.3	4.25823e-06
		2757.25	4.15581e-06
		2758.2	4.0558e-06
		2759.15	3.95816e-06
		2760.1	3.86284e-06
		2761.05	3.76978e-06
		2762	3.67893e-06
		2762.95	3.59025e-06
		2763.9	3.50367e-06
		2764.85	3.41917e-06
		2765.8	3.33669e-06
		2766.75	3.25618e-06
		2767.7	3.17759e-06
		2768.65	3.1009e-06
		2769.6	3.02604e-06
		2770.55	2.95299e-06
		2771.5	2.88169e-06
		2772.45	2.81211e-06
		2773.4	2.74421e-06
		2774.35	2.67794e-06
		2775.3	2.61328e-06
		2776.25	2.55018e-06
		2777.2	2.48861e-06
		2778.15	2.42852e-06
		2779.1	2.3699e-06
		2780.05	2.31269e-06
		2781	2.25688e-06
		2781.95	2.20241e-06
		2782.9	2.14928e-06
		2783.85	2.09743e-06
		2784.8	2.04684e-06
		2785.75	1.99748e-06
		2786.7	1.94933e-06
		2787.65	1.90235e-06
		2788.6	1.85651e-06
		2789.55	1.81179e-06
		2790.5	1.76816e-06
		2791.45	1.72559e-06
		2792.4	1.68406e-06
		2793.35	1.64354e-06
		2794.3	1.60401e-06
		2795.25	1.56545e-06
		2796.2	1.52783e-06
		2797.15	1.49112e-06
		2798.1	1.45531e-06
		2799.05	1.37332e-06
[truncated: 1 more rows]

## Sheet: PlotDat5
Source sheet	Sheet1	0.2	2388.47	1	2398.76	73.1673	0.85	2325.6
Plot name	Average3	20.8	2388.47	2	2377	71.0594	1.15	2325.6
Plot Type	15			3	2472.98	91.211	1.15	2471.93
1st free col	8			4	2402.07	51.997	0.85	2471.93
Sigma Level	1			5	2335.11	71.7477	0.85	2325.6
Absolute Errs	TRUE			6	2324.25	153.301	ErrBox	ErrBox
Symbol Type	1			7	2366.49	66.9883	1.85	2305.94
Inverse Plot	FALSE			8	2393.52	62.325	2.15	2305.94
Color Plot	TRUE			9	2362.56	51.1537	2.15	2448.06
3D plot	FALSE			10	2381.37	69.692	1.85	2448.06
Linear	FALSE			11	2395.61	98.9359	1.85	2305.94
Data Range	R4:S23			12	2319.21	62.9976	ErrBox	ErrBox
Filled Symbols	TRUE			13	2447.72	49.888	2.85	2381.77
ConcAge	FALSE			14	2342.47	60.9423	3.15	2381.77
ConcSwap	FALSE			15	2346.43	73.4135	3.15	2564.19
1st Symbol-row	1			16	2439.06	67.4852	2.85	2564.19
				17	2402.55	61.6074	2.85	2381.77
				18	2368.1	56.1232	ErrBox	ErrBox
				19	2380.09	73.7874	3.85	2350.07
				20	2442.73	52.7142	4.15	2350.07
				IsoLine	IsoLine	IsoLine	4.15	2454.07
							3.85	2454.07
							3.85	2350.07
							ErrBox	ErrBox
							4.85	2263.36
							5.15	2263.36
							5.15	2406.86
							4.85	2406.86
							4.85	2263.36
							ErrBox	ErrBox
							5.85	2170.95
							6.15	2170.95
							6.15	2477.55
							5.85	2477.55
							5.85	2170.95
							ErrBox	ErrBox
							6.85	2299.5
							7.15	2299.5
							7.15	2433.48
							6.85	2433.48
							6.85	2299.5
							ErrBox	ErrBox
							7.85	2331.19
							8.15	2331.19
							8.15	2455.84
							7.85	2455.84
							7.85	2331.19
							ErrBox	ErrBox
							8.85	2311.41
							9.15	2311.41
							9.15	2413.71
							8.85	2413.71
							8.85	2311.41
							ErrBox	ErrBox
							9.85	2311.68
							10.15	2311.68
							10.15	2451.06
							9.85	2451.06
							9.85	2311.68
							ErrBox	ErrBox
							10.85	2296.67
							11.15	2296.67
							11.15	2494.55
							10.85	2494.55
							10.85	2296.67
							ErrBox	ErrBox
							11.85	2256.21
							12.15	2256.21
							12.15	2382.21
							11.85	2382.21
							11.85	2256.21
							ErrBox	ErrBox
							12.85	2397.83
							13.15	2397.83
							13.15	2497.61
							12.85	2497.61
							12.85	2397.83
							ErrBox	ErrBox
							13.85	2281.53
							14.15	2281.53
							14.15	2403.41
							13.85	2403.41
							13.85	2281.53
							ErrBox	ErrBox
							14.85	2273.01
							15.15	2273.01
							15.15	2419.84
							14.85	2419.84
							14.85	2273.01
							ErrBox	ErrBox
							15.85	2371.57
							16.15	2371.57
							16.15	2506.54
							15.85	2506.54
							15.85	2371.57
							ErrBox	ErrBox
							16.85	2340.94
							17.15	2340.94
							17.15	2464.16
							16.85	2464.16
							16.85	2340.94
							ErrBox	ErrBox
							17.85	2311.97
							18.15	2311.97
							18.15	2424.22
							17.85	2424.22
							17.85	2311.97
							ErrBox	ErrBox
							18.85	2306.3
							19.15	2306.3
							19.15	2453.88
							18.85	2453.88
							18.85	2306.3
							ErrBox	ErrBox
							19.85	2390.01
							20.15	2390.01
							20.15	2495.44
							19.85	2495.44
							19.85	2390.01
							ErrBox	ErrBox

## Sheet: PlotDat4
Source sheet	Sheet1	-24	1.12277e-07	-21.2	0	-24	0
Plot name	ProbDens3	-23.986	1.212e-07	-18.4	0	3.986	0
Plot Type	16	-23.972	1.30801e-07	-18.4	6
1st free col	9	-23.958	1.41128e-07	-21.2	6
Sigma Level	1	-23.944	1.52233e-07	-21.2	0
Absolute Errs	TRUE	-23.93	1.64173e-07	ErrBox	ErrBox
Symbol Type	1	-23.916	1.77006e-07	-18.4	0
Inverse Plot	FALSE	-23.902	1.90797e-07	-15.6	0
Color Plot	TRUE	-23.888	2.05612e-07	-15.6	14
3D plot	FALSE	-23.874	2.21524e-07	-18.4	14
Linear	FALSE	-23.86	2.88021e-07	-18.4	0
Data Range	M2:N23	-23.846	3.0903e-07	ErrBox	ErrBox
Filled Symbols	TRUE	-23.832	3.31519e-07	-1.6	0
ConcAge	FALSE	-23.818	3.55589e-07	1.2	0
ConcSwap	FALSE	-23.804	3.81347e-07	1.2	1
1st Symbol-row	1	-23.79	4.08904e-07	-1.6	1
		-23.776	4.3838e-07	-1.6	0
		-23.762	4.69905e-07	ErrBox	ErrBox
		-23.748	5.03612e-07
		-23.734	5.39646e-07
		-23.72	5.78159e-07
		-23.706	6.19315e-07
		-23.692	6.63285e-07
		-23.678	7.10252e-07
		-23.664	7.6041e-07
		-23.65	8.13965e-07
		-23.636	8.71135e-07
		-23.622	9.3215e-07
		-23.608	9.97256e-07
		-23.594	1.06671e-06
		-23.58	1.1408e-06
		-23.566	1.21979e-06
		-23.552	1.30402e-06
		-23.538	1.39379e-06
		-23.524	1.48946e-06
		-23.51	1.59139e-06
		-23.496	1.69996e-06
		-23.482	1.81559e-06
		-23.468	1.9387e-06
		-23.454	2.06976e-06
		-23.44	2.20923e-06
		-23.426	2.35763e-06
		-23.412	2.5155e-06
		-23.398	2.6834e-06
		-23.384	2.86193e-06
		-23.37	3.05171e-06
		-23.356	3.25342e-06
		-23.342	3.46774e-06
		-23.328	3.69542e-06
		-23.314	3.93724e-06
		-23.3	4.19401e-06
		-23.286	4.4666e-06
		-23.272	4.7559e-06
		-23.258	5.06288e-06
		-23.244	5.38854e-06
		-23.23	5.73393e-06
		-23.216	6.10017e-06
		-23.202	6.48842e-06
		-23.188	6.8999e-06
		-23.174	7.3359e-06
		-23.16	7.79778e-06
		-23.146	8.33509e-06
		-23.132	8.85679e-06
		-23.118	9.40911e-06
		-23.104	9.99371e-06
		-23.09	1.06123e-05
		-23.076	1.12668e-05
		-23.062	1.1959e-05
		-23.048	1.2691e-05
		-23.034	1.34649e-05
		-23.02	1.42828e-05
		-23.006	1.5147e-05
		-22.992	1.60601e-05
		-22.978	1.70243e-05
		-22.964	1.80426e-05
		-22.95	1.91174e-05
		-22.936	2.02518e-05
		-22.922	2.14488e-05
		-22.908	2.27115e-05
		-22.894	2.40431e-05
		-22.88	2.5495e-05
		-22.866	2.69798e-05
		-22.852	2.85447e-05
		-22.838	3.01937e-05
		-22.824	3.19309e-05
		-22.81	3.37605e-05
		-22.796	3.5687e-05
		-22.782	3.77151e-05
		-22.768	3.98496e-05
		-22.754	4.20954e-05
		-22.74	4.4458e-05
		-22.726	4.69427e-05
		-22.712	4.95551e-05
		-22.698	5.23013e-05
		-22.684	5.51874e-05
		-22.67	5.82196e-05
		-22.656	6.14048e-05
		-22.642	6.47497e-05
		-22.628	6.82616e-05
		-22.614	7.19478e-05
		-22.6	7.58161e-05
		-22.586	7.98746e-05
		-22.572	8.41314e-05
		-22.558	8.85952e-05
		-22.544	9.33252e-05
		-22.53	9.82359e-05
		-22.516	0.000103382
		-22.502	0.000108774
		-22.488	0.000114421
		-22.474	0.000120387
		-22.46	0.000126584
		-22.446	0.000133071
		-22.432	0.00013986
		-22.418	0.000146963
		-22.404	0.000154393
		-22.39	0.000162212
		-22.376	0.000170341
		-22.362	0.000178837
		-22.348	0.000187717
		-22.334	0.000196995
		-22.32	0.000206686
		-22.306	0.000216807
		-22.292	0.000227375
		-22.278	0.000238407
		-22.264	0.00024992
		-22.25	0.000261933
		-22.236	0.000274464
		-22.222	0.000287534
		-22.208	0.000301162
		-22.194	0.000315369
		-22.18	0.000330176
		-22.166	0.000345606
		-22.152	0.000361681
		-22.138	0.000378424
		-22.124	0.000395909
		-22.11	0.000414067
		-22.096	0.000432968
		-22.082	0.000452638
		-22.068	0.000473105
		-22.054	0.000494448
		-22.04	0.000516597
		-22.026	0.000539629
		-22.012	0.000563574
		-21.998	0.000588515
		-21.984	0.000614387
		-21.97	0.00064132
		-21.956	0.000669302
		-21.942	0.000698318
		-21.928	0.000728449
		-21.914	0.000759734
		-21.9	0.000792211
		-21.886	0.000825917
		-21.872	0.000860944
		-21.858	0.00089724
		-21.844	0.000934891
		-21.83	0.000973941
		-21.816	0.00101444
		-21.802	0.00105642
		-21.788	0.00109994
		-21.774	0.00114506
		-21.76	0.00119181
		-21.746	0.00124024
		-21.732	0.00129043
		-21.718	0.00134241
		-21.704	0.00139629
		-21.69	0.00145204
		-21.676	0.00150976
		-21.662	0.00156952
		-21.648	0.00163137
		-21.634	0.00169538
		-21.62	0.00176163
		-21.606	0.00183016
		-21.592	0.00190107
		-21.578	0.00197442
		-21.564	0.00205033
		-21.55	0.00212879
		-21.536	0.00220992
		-21.522	0.0022938
		-21.508	0.00238052
		-21.494	0.00247016
		-21.48	0.00256282
		-21.466	0.00265858
		-21.452	0.00275754
		-21.438	0.0028598
		-21.424	0.0029655
		-21.41	0.00307465
		-21.396	0.00318742
		-21.382	0.00330389
		-21.368	0.0034242
		-21.354	0.00354845
		-21.34	0.00367676
		-21.326	0.00380931
		-21.312	0.00394612
		-21.298	0.00408738
		-21.284	0.00423322
		-21.27	0.00438377
		-21.256	0.00453918
		-21.242	0.0046996
		-21.228	0.00486518
		-21.214	0.00503611
		-21.2	0.00521248
		-21.186	0.00539448
		-21.172	0.00558229
		-21.158	0.00577608
		-21.144	0.00597608
		-21.13	0.00618238
		-21.116	0.00639521
		-21.102	0.00661478
		-21.088	0.00684127
		-21.074	0.00707491
		-21.06	0.00731589
		-21.046	0.00756443
		-21.032	0.00782076
		-21.018	0.00808511
		-21.004	0.00835772
		-20.99	0.00863881
		-20.976	0.00892865
		-20.962	0.00922747
		-20.948	0.00953556
		-20.934	0.00985315
		-20.92	0.0101805
		-20.906	0.010518
		-20.892	0.0108658
		-20.878	0.0112243
		-20.864	0.0115937
		-20.85	0.0119743
		-20.836	0.0123665
		-20.822	0.0127706
		-20.808	0.0131868
		-20.794	0.0136156
		-20.78	0.0140573
		-20.766	0.0145121
		-20.752	0.0149805
		-20.738	0.0154627
		-20.724	0.0159593
		-20.71	0.0164704
		-20.696	0.0169965
		-20.682	0.017538
		-20.668	0.0180952
		-20.654	0.0186685
		-20.64	0.0192584
		-20.626	0.0198651
		-20.612	0.0204892
		-20.598	0.0211309
		-20.584	0.0217907
		-20.57	0.022469
		-20.556	0.0231663
		-20.542	0.0238828
		-20.528	0.0246191
		-20.514	0.0253756
		-20.5	0.0261526
		-20.486	0.0269506
		-20.472	0.0277699
		-20.458	0.0286111
		-20.444	0.0294745
		-20.43	0.0303605
		-20.416	0.0312696
		-20.402	0.0322021
		-20.388	0.0331585
		-20.374	0.0341392
		-20.36	0.0351445
		-20.346	0.0361748
		-20.332	0.0372306
		-20.318	0.0383122
		-20.304	0.0394201
		-20.29	0.0405544
		-20.276	0.0417157
		-20.262	0.0429043
		-20.248	0.0441205
		-20.234	0.0453647
		-20.22	0.0466371
		-20.206	0.0479381
		-20.192	0.049268
		-20.178	0.0506271
		-20.164	0.0520156
		-20.15	0.0534338
		-20.136	0.054882
		-20.122	0.0563603
		-20.108	0.0578691
		-20.094	0.0594085
		-20.08	0.0609786
		-20.066	0.0625798
		-20.052	0.064212
		-20.038	0.0658755
		-20.024	0.0675703
		-20.01	0.0692966
		-19.996	0.0710544
		-19.982	0.0728437
		-19.968	0.0746647
		-19.954	0.0765173
		-19.94	0.0784015
		-19.926	0.0803173
		-19.912	0.0822647
		-19.898	0.0842435
		-19.884	0.0862537
		-19.87	0.0882951
		-19.856	0.0903677
		-19.842	0.0924712
		-19.828	0.0946055
		-19.814	0.0967703
		-19.8	0.0989655
		-19.786	0.101191
		-19.772	0.103446
		-19.758	0.10573
		-19.744	0.108044
		-19.73	0.110387
		-19.716	0.112758
		-19.702	0.115157
		-19.688	0.117584
		-19.674	0.120038
		-19.66	0.122519
		-19.646	0.125026
		-19.632	0.127559
		-19.618	0.130117
		-19.604	0.1327
		-19.59	0.135308
		-19.576	0.137939
		-19.562	0.140593
		-19.548	0.143269
		-19.534	0.145968
		-19.52	0.148687
		-19.506	0.151427
		-19.492	0.154187
		-19.478	0.156966
		-19.464	0.159763
		-19.45	0.162578
		-19.436	0.16541
		-19.422	0.168259
		-19.408	0.171122
		-19.394	0.174001
		-19.38	0.176893
		-19.366	0.179798
		-19.352	0.182716
		-19.338	0.185645
		-19.324	0.188584
		-19.31	0.191533
		-19.296	0.194492
		-19.282	0.197458
		-19.268	0.200431
		-19.254	0.203411
		-19.24	0.206396
		-19.226	0.209385
		-19.212	0.212378
		-19.198	0.215374
		-19.184	0.218371
		-19.17	0.221369
		-19.156	0.224367
		-19.142	0.227364
		-19.128	0.230359
		-19.114	0.233351
		-19.1	0.236339
		-19.086	0.239322
		-19.072	0.2423
		-19.058	0.24527
		-19.044	0.248233
		-19.03	0.251187
		-19.016	0.254131
		-19.002	0.257065
		-18.988	0.259987
		-18.974	0.262895
		-18.96	0.265791
		-18.946	0.268671
		-18.932	0.271536
		-18.918	0.274384
		-18.904	0.277214
		-18.89	0.280025
		-18.876	0.282816
		-18.862	0.285586
		-18.848	0.288335
		-18.834	0.29106
		-18.82	0.293761
		-18.806	0.296437
		-18.792	0.299087
		-18.778	0.30171
		-18.764	0.304304
		-18.75	0.306869
		-18.736	0.309403
		-18.722	0.311906
		-18.708	0.314377
		-18.694	0.316813
		-18.68	0.319215
		-18.666	0.321581
		-18.652	0.323909
		-18.638	0.3262
		-18.624	0.328452
		-18.61	0.330663
		-18.596	0.332833
		-18.582	0.334961
		-18.568	0.337045
		-18.554	0.339084
		-18.54	0.341078
		-18.526	0.343025
		-18.512	0.344925
		-18.498	0.346775
		-18.484	0.348576
		-18.47	0.350325
		-18.456	0.352023
		-18.442	0.353667
		-18.428	0.355258
		-18.414	0.356793
		-18.4	0.358273
		-18.386	0.359695
		-18.372	0.361059
		-18.358	0.362365
		-18.344	0.363611
		-18.33	0.364796
		-18.316	0.365919
		-18.302	0.36698
		-18.288	0.367977
		-18.274	0.368911
		-18.26	0.369779
		-18.246	0.370582
		-18.232	0.371319
		-18.218	0.371988
		-18.204	0.37259
		-18.19	0.373123
		-18.176	0.373587
		-18.162	0.373981
		-18.148	0.374306
		-18.134	0.37456
		-18.12	0.374743
		-18.106	0.374854
		-18.092	0.374893
		-18.078	0.374861
		-18.064	0.374755
		-18.05	0.374577
		-18.036	0.374327
		-18.022	0.374003
		-18.008	0.373605
		-17.994	0.373135
		-17.98	0.372591
		-17.966	0.371974
		-17.952	0.371284
		-17.938	0.37052
		-17.924	0.369684
		-17.91	0.368775
		-17.896	0.367794
		-17.882	0.36674
		-17.868	0.365615
		-17.854	0.364419
		-17.84	0.363152
		-17.826	0.361814
		-17.812	0.360407
		-17.798	0.35893
		-17.784	0.357385
		-17.77	0.355773
		-17.756	0.354093
		-17.742	0.352348
		-17.728	0.350537
		-17.714	0.348661
		-17.7	0.346723
		-17.686	0.344721
		-17.672	0.342659
		-17.658	0.340536
		-17.644	0.338354
		-17.63	0.336113
		-17.616	0.333816
		-17.602	0.331464
		-17.588	0.329057
		-17.574	0.326596
		-17.56	0.324085
		-17.546	0.321523
		-17.532	0.318912
		-17.518	0.316253
		-17.504	0.313549
		-17.49	0.310799
		-17.476	0.308007
		-17.462	0.305174
		-17.448	0.3023
		-17.434	0.299388
		-17.42	0.296439
		-17.406	0.293455
		-17.392	0.290438
		-17.378	0.287388
		-17.364	0.284308
		-17.35	0.2812
		-17.336	0.278064
		-17.322	0.274903
		-17.308	0.271719
		-17.294	0.268512
		-17.28	0.265285
		-17.266	0.26204
		-17.252	0.258777
		-17.238	0.255499
		-17.224	0.252207
		-17.21	0.248903
		-17.196	0.245589
		-17.182	0.242266
		-17.168	0.238935
		-17.154	0.235599
		-17.14	0.232259
		-17.126	0.228916
		-17.112	0.225572
		-17.098	0.222229
		-17.084	0.218887
		-17.07	0.21555
		-17.056	0.212217
		-17.042	0.20889
		-17.028	0.205571
		-17.014	0.202262
		-17	0.198963
		-16.986	0.195675
		-16.972	0.192401
		-16.958	0.189141
		-16.944	0.185897
		-16.93	0.182669
		-16.916	0.179459
		-16.902	0.176268
		-16.888	0.173098
		-16.874	0.169949
		-16.86	0.166821
		-16.846	0.163718
		-16.832	0.160638
		-16.818	0.157583
		-16.804	0.154555
		-16.79	0.151553
		-16.776	0.148579
		-16.762	0.145633
		-16.748	0.142717
		-16.734	0.13983
		-16.72	0.136974
		-16.706	0.134149
		-16.692	0.131357
		-16.678	0.128596
		-16.664	0.125868
		-16.65	0.123174
		-16.636	0.120514
		-16.622	0.117888
		-16.608	0.115297
		-16.594	0.112741
		-16.58	0.11022
		-16.566	0.107735
		-16.552	0.105286
		-16.538	0.102873
		-16.524	0.100496
		-16.51	0.0981566
		-16.496	0.0958535
		-16.482	0.0935873
		-16.468	0.091358
		-16.454	0.0891657
		-16.44	0.0870104
		-16.426	0.0848922
		-16.412	0.082811
		-16.398	0.0807668
		-16.384	0.0787595
		-16.37	0.076789
		-16.356	0.0748553
		-16.342	0.072958
		-16.328	0.0710972
		-16.314	0.0692726
		-16.3	0.067484
		-16.286	0.0657313
		-16.272	0.0640141
		-16.258	0.0623322
		-16.244	0.0606853
		-16.23	0.0590732
		-16.216	0.0574955
		-16.202	0.055952
		-16.188	0.0544422
		-16.174	0.0529659
		-16.16	0.0515227
		-16.146	0.0501121
		-16.132	0.0487339
		-16.118	0.0473877
		-16.104	0.0460729
		-16.09	0.0447893
		-16.076	0.0435364
		-16.062	0.0423138
		-16.048	0.041121
		-16.034	0.0399575
		-16.02	0.0388231
		-16.006	0.0377171
		-15.992	0.0366391
		-15.978	0.0355887
		-15.964	0.0345654
		-15.95	0.0335688
		-15.936	0.0325983
		-15.922	0.0316534
		-15.908	0.0307338
		-15.894	0.0298389
		-15.88	0.0289683
		-15.866	0.0281215
		-15.852	0.0272979
		-15.838	0.0264972
		-15.824	0.0257188
		-15.81	0.0249623
		-15.796	0.0242272
		-15.782	0.0235131
		-15.768	0.0228194
		-15.754	0.0221457
		-15.74	0.0214916
		-15.726	0.0208565
		-15.712	0.0202401
		-15.698	0.0196419
		-15.684	0.0190614
		-15.67	0.0184983
		-15.656	0.017952
		-15.642	0.0174221
		-15.628	0.0169084
		-15.614	0.0164102
		-15.6	0.0159272
		-15.586	0.015459
		-15.572	0.0150053
		-15.558	0.0145655
		-15.544	0.0141393
		-15.53	0.0137264
		-15.516	0.0133264
		-15.502	0.0129388
		-15.488	0.0125634
		-15.474	0.0121998
		-15.46	0.0118476
		-15.446	0.0115065
		-15.432	0.0111762
		-15.418	0.0108564
		-15.404	0.0105466
		-15.39	0.0102467
		-15.376	0.00995634
		-15.362	0.00967516
		-15.348	0.00940291
		-15.334	0.00913931
		-15.32	0.00888408
		-15.306	0.00863694
		-15.292	0.00839765
		-15.278	0.00816594
		-15.264	0.00794157
		-15.25	0.00772429
		-15.236	0.00751387
		-15.222	0.00731008
		-15.208	0.0071127
		-15.194	0.0069215
		-15.18	0.00673629
		-15.166	0.00655686
		-15.152	0.00638301
		-15.138	0.00621455
		-15.124	0.00605124
		-15.11	0.00589301
		-15.096	0.00573963
		-15.082	0.00559093
		-15.068	0.00544675
		-15.054	0.00530692
		-15.04	0.00517131
		-15.026	0.00503975
		-15.012	0.00491211
		-14.998	0.00478824
		-14.984	0.00466803
		-14.97	0.00455133
		-14.956	0.00443798
		-14.942	0.0043279
		-14.928	0.00422104
		-14.914	0.00411722
		-14.9	0.00401634
		-14.886	0.0039183
		-14.872	0.00382299
		-14.858	0.00373033
		-14.844	0.00364022
		-14.83	0.00355257
		-14.816	0.00346729
		-14.802	0.00338431
		-14.788	0.00330355
		-14.774	0.00322493
		-14.76	0.00314837
		-14.746	0.00307381
		-14.732	0.00300119
		-14.718	0.00293043
		-14.704	0.00286143
		-14.69	0.00279422
		-14.676	0.0027287
		-14.662	0.00266481
		-14.648	0.00260251
		-14.634	0.00254173
		-14.62	0.00248244
		-14.606	0.00242458
		-14.592	0.00236811
		-14.578	0.00231299
		-14.564	0.00225917
		-14.55	0.00220658
		-14.536	0.00215527
		-14.522	0.00210515
		-14.508	0.00205619
		-14.494	0.00200836
		-14.48	0.00196162
		-14.466	0.00191594
		-14.452	0.0018713
		-14.438	0.00182766
		-14.424	0.001785
		-14.41	0.00174329
		-14.396	0.0017025
		-14.382	0.00166262
		-14.368	0.00162362
		-14.354	0.00158548
		-14.34	0.00154812
		-14.326	0.00151158
		-14.312	0.00147589
		-14.298	0.00144093
		-14.284	0.00140678
		-14.27	0.00137336
		-14.256	0.00134067
		-14.242	0.00130868
		-14.228	0.00127738
		-14.214	0.00124675
		-14.2	0.00121674
		-14.186	0.00118742
		-14.172	0.00115873
		-14.158	0.00113066
		-14.144	0.00110319
		-14.13	0.00107631
		-14.116	0.00105001
		-14.102	0.00102427
		-14.088	0.000999095
		-14.074	0.000974459
		-14.06	0.00095031
		-14.046	0.000926733
		-14.032	0.000903623
		-14.018	0.000881063
		-14.004	0.000858994
		-13.99	0.00083736
		-13.976	0.000816249
		-13.962	0.0007956
		-13.948	0.000775404
		-13.934	0.000755654
		-13.92	0.00073634
		-13.906	0.000717453
		-13.892	0.000698987
		-13.878	0.000680933
		-13.864	0.000663283
		-13.85	0.000646029
		-13.836	0.000629164
		-13.822	0.00061268
		-13.808	0.000596571
		-13.794	0.000580828
		-13.78	0.000565446
		-13.766	0.000550371
		-13.752	0.000535692
		-13.738	0.000521353
		-13.724	0.000507347
		-13.71	0.000493667
		-13.696	0.000480307
		-13.682	0.000467261
		-13.668	0.000454523
		-13.654	0.000442087
		-13.64	0.000429947
		-13.626	0.000418097
		-13.612	0.000406531
		-13.598	0.000395245
		-13.584	0.000384231
		-13.57	0.000373486
		-13.556	0.000363002
		-13.542	0.000352776
		-13.528	0.000342802
		-13.514	0.000333075
		-13.5	0.000323589
		-13.486	0.00031434
		-13.472	0.000305231
		-13.458	0.000296449
		-13.444	0.000287888
		-13.43	0.000279544
		-13.416	0.000271413
		-13.402	0.00026349
		-13.388	0.00025577
		-13.374	0.00024825
		-13.36	0.000240925
		-13.346	0.000233745
		-13.332	0.000226757
		-13.318	0.00022
		-13.304	0.000213421
		-13.29	0.000207015
		-13.276	0.00020078
		-13.262	0.000194711
		-13.248	0.000188805
		-13.234	0.000183058
		-13.22	0.000177466
		-13.206	0.000172026
		-13.192	0.000166734
		-13.178	0.000161588
		-13.164	0.000156583
		-13.15	0.000151716
		-13.136	0.000146984
		-13.122	0.000142385
		-13.108	0.000137914
		-13.094	0.000133568
		-13.08	0.000129346
		-13.066	0.000125243
		-13.052	0.000121257
		-13.038	0.000117384
		-13.024	0.000113623
		-13.01	0.000109971
		-12.996	0.000106424
		-12.982	0.00010298
		-12.968	9.96363e-05
		-12.954	9.63908e-05
		-12.94	9.32408e-05
		-12.926	9.01837e-05
		-12.912	8.72173e-05
		-12.898	8.43392e-05
		-12.884	8.15471e-05
		-12.87	7.88387e-05
		-12.856	7.62118e-05
		-12.842	7.36644e-05
		-12.828	7.11943e-05
		-12.814	6.87995e-05
		-12.8	6.64779e-05
		-12.786	6.42275e-05
		-12.772	6.20465e-05
		-12.758	5.9933e-05
		-12.744	5.7885e-05
		-12.73	5.59009e-05
		-12.716	5.39789e-05
		-12.702	5.21172e-05
		-12.688	5.03142e-05
		-12.674	4.85682e-05
		-12.66	4.68776e-05
		-12.646	4.52409e-05
		-12.632	4.36565e-05
		-12.618	4.2123e-05
		-12.604	4.06388e-05
		-12.59	3.92027e-05
		-12.576	3.78131e-05
		-12.562	3.64688e-05
		-12.548	3.51684e-05
		-12.534	3.39106e-05
		-12.52	3.26942e-05
		-12.506	3.1518e-05
		-12.492	3.03807e-05
		-12.478	2.92812e-05
		-12.464	2.82185e-05
		-12.45	2.71913e-05
		-12.436	2.61986e-05
		-12.422	2.52394e-05
		-12.408	2.43126e-05
		-12.394	2.34173e-05
		-12.38	2.25524e-05
		-12.366	2.17171e-05
		-12.352	2.09105e-05
		-12.338	2.01315e-05
		-12.324	1.93795e-05
		-12.31	1.86535e-05
		-12.296	1.79527e-05
		-12.282	1.72764e-05
		-12.268	1.66237e-05
		-12.254	1.59939e-05
		-12.24	1.53862e-05
		-12.226	1.48001e-05
		-12.212	1.42346e-05
		-12.198	1.36893e-05
		-12.184	1.31634e-05
		-12.17	1.26564e-05
		-12.156	1.21675e-05
		-12.142	1.16962e-05
		-12.128	1.12419e-05
		-12.114	1.08041e-05
		-12.1	1.03822e-05
		-12.086	9.97566e-06
		-12.072	9.58399e-06
		-12.058	9.20669e-06
		-12.044	8.84326e-06
		-12.03	8.49325e-06
		-12.016	8.15619e-06
		-12.002	7.83164e-06
		-11.988	7.51918e-06
		-11.974	7.21839e-06
		-11.96	6.92887e-06
		-11.946	6.65023e-06
		-11.932	6.3821e-06
		-11.918	6.1241e-06
		-11.904	5.87588e-06
		-11.89	5.6371e-06
		-11.876	5.40743e-06
		-11.862	5.18655e-06
		-11.848	4.97414e-06
		-11.834	4.7699e-06
		-11.82	4.57355e-06
		-11.806	4.38479e-06
		-11.792	4.20337e-06
		-11.778	4.029e-06
		-11.764	3.86145e-06
		-11.75	3.70045e-06
		-11.736	3.54578e-06
		-11.722	3.3972e-06
		-11.708	3.25448e-06
		-11.694	3.11742e-06
		-11.68	2.9858e-06
		-11.666	2.85942e-06
		-11.652	2.7381e-06
		-11.638	2.62163e-06
		-11.624	2.50983e-06
		-11.61	2.40254e-06
		-11.596	2.29959e-06
		-11.582	2.2008e-06
		-11.568	2.10602e-06
		-11.554	2.01511e-06
		-11.54	1.92791e-06
		-11.526	1.84427e-06
		-11.512	1.76407e-06
		-11.498	1.68718e-06
		-11.484	1.61345e-06
		-11.47	1.54278e-06
		-11.456	1.47504e-06
		-11.442	1.41012e-06
		-11.428	1.34791e-06
		-11.414	1.2883e-06
		-11.4	1.2312e-06
		-11.386	1.17649e-06
		-11.372	1.12409e-06
		-11.358	1.07391e-06
		-11.344	1.02585e-06
		-11.33	9.79839e-07
		-11.316	9.35787e-07
		-11.302	8.93616e-07
		-11.288	8.53252e-07
		-11.274	8.14621e-07
		-11.26	7.77654e-07
		-11.246	7.42283e-07
		-11.232	7.08442e-07
		-11.218	6.7607e-07
		-11.204	6.45106e-07
		-11.19	6.15492e-07
		-11.176	5.87173e-07
		-11.162	5.60095e-07
		-11.148	5.34207e-07
		-11.134	5.0946e-07
		-11.12	4.85806e-07
		-11.106	4.63198e-07
		-11.092	4.41595e-07
		-11.078	4.20952e-07
		-11.064	4.0123e-07
		-11.05	3.8239e-07
		-11.036	3.64395e-07
		-11.022	3.47208e-07
		-11.008	3.30795e-07
		-10.994	3.15124e-07
		-10.98	3.00162e-07
		-10.966	2.85879e-07
		-10.952	2.72245e-07
		-10.938	2.59233e-07
		-10.924	2.46816e-07
		-10.91	2.34968e-07
		-10.896	2.23664e-07
		-10.882	2.1288e-07
		-10.868	2.02594e-07
		-10.854	1.92783e-07
		-10.84	1.83428e-07
		-10.826	1.74507e-07
		-10.812	1.66002e-07
		-10.798	1.57894e-07
		-10.784	1.50166e-07
		-10.77	1.428e-07
		-10.756	1.3578e-07
		-10.742	1.29091e-07
		-10.728	1.22718e-07
		-10.714	1.16647e-07
		-10.7	1.10865e-07
		-10.686	1.05357e-07
		-10.672	1.00112e-07
		-10.658	9.5117e-08
		-10.644	9.03617e-08
		-10.63	8.58347e-08
		-10.616	8.15255e-08
		-10.602	7.74241e-08
		-10.588	7.35209e-08
		-10.574	6.98068e-08
		-10.56	6.62731e-08
		-10.546	6.29113e-08
		-10.532	5.97134e-08
		-10.518	5.66719e-08
		-10.504	5.37793e-08
		-10.49	5.10288e-08
		-10.476	4.84136e-08
		-10.462	0
		-10.448	0
		-10.434	0
		-10.42	0
		-10.406	0
		-10.392	0
		-10.378	0
		-10.364	0
		-10.35	0
		-10.336	0
		-10.322	0
		-10.308	0
		-10.294	0
		-10.28	0
		-10.266	0
		-10.252	0
		-10.238	0
		-10.224	0
		-10.21	0
		-10.196	0
		-10.182	0
		-10.168	0
		-10.154	0
		-10.14	0
		-10.126	0
		-10.112	0
		-10.098	0
		-10.084	0
		-10.07	0
		-10.056	0
		-10.042	0
		-10.028	0
		-10.014	0
		-10	0
		-9.986	0
		-9.972	0
		-9.958	0
		-9.944	0
		-9.93	0
		-9.916	0
		-9.902	0
		-9.888	0
		-9.874	0
		-9.86	0
		-9.846	0
		-9.832	0
		-9.818	0
		-9.804	0
		-9.79	0
		-9.776	0
		-9.762	0
		-9.748	0
		-9.734	0
		-9.72	0
		-9.706	0
		-9.692	0
		-9.678	0
		-9.664	0
		-9.65	0
		-9.636	0
		-9.622	0
		-9.608	0
		-9.594	0
		-9.58	0
		-9.566	0
		-9.552	0
		-9.538	0
		-9.524	0
		-9.51	0
		-9.496	0
		-9.482	0
		-9.468	0
		-9.454	0
		-9.44	0
		-9.426	0
		-9.412	0
		-9.398	0
		-9.384	0
		-9.37	0
		-9.356	0
		-9.342	0
		-9.328	0
		-9.314	0
		-9.3	0
		-9.286	0
		-9.272	0
		-9.258	0
		-9.244	0
		-9.23	0
		-9.216	0
		-9.202	0
		-9.188	0
		-9.174	0
		-9.16	0
		-9.146	0
		-9.132	0
		-9.118	0
		-9.104	0
		-9.09	0
		-9.076	0
		-9.062	0
		-9.048	0
		-9.034	0
		-9.02	0
		-9.006	0
		-8.992	0
		-8.978	0
		-8.964	0
		-8.95	0
		-8.936	0
		-8.922	0
		-8.908	0
		-8.894	0
		-8.88	0
		-8.866	0
		-8.852	0
		-8.838	0
		-8.824	0
		-8.81	0
		-8.796	0
		-8.782	0
		-8.768	0
		-8.754	0
		-8.74	0
		-8.726	0
		-8.712	0
		-8.698	0
		-8.684	0
		-8.67	0
		-8.656	0
		-8.642	0
		-8.628	0
		-8.614	0
		-8.6	0
		-8.586	0
		-8.572	0
		-8.558	0
		-8.544	0
		-8.53	0
		-8.516	0
		-8.502	0
		-8.488	0
		-8.474	0
		-8.46	0
		-8.446	0
		-8.432	0
		-8.418	0
		-8.404	0
		-8.39	0
		-8.376	0
		-8.362	0
		-8.348	0
		-8.334	0
		-8.32	0
		-8.306	0
		-8.292	0
		-8.278	0
		-8.264	0
		-8.25	0
		-8.236	0
		-8.222	0
		-8.208	0
		-8.194	0
		-8.18	0
		-8.166	0
		-8.152	0
		-8.138	0
		-8.124	0
		-8.11	0
		-8.096	0
		-8.082	0
		-8.068	0
		-8.054	0
		-8.04	0
		-8.026	0
		-8.012	0
		-7.998	0
		-7.984	0
		-7.97	0
		-7.956	0
		-7.942	0
		-7.928	0
		-7.914	0
		-7.9	0
		-7.886	0
		-7.872	0
		-7.858	0
		-7.844	0
		-7.83	0
		-7.816	0
		-7.802	0
		-7.788	0
		-7.774	0
		-7.76	0
		-7.746	0
		-7.732	0
		-7.718	0
		-7.704	0
		-7.69	0
		-7.676	0
		-7.662	0
		-7.648	0
		-7.634	0
		-7.62	0
		-7.606	0
		-7.592	0
		-7.578	0
		-7.564	0
		-7.55	0
		-7.536	0
		-7.522	0
		-7.508	0
		-7.494	0
		-7.48	0
		-7.466	0
		-7.452	0
		-7.438	0
		-7.424	0
		-7.41	0
		-7.396	0
		-7.382	0
		-7.368	0
		-7.354	0
		-7.34	0
		-7.326	0
		-7.312	0
		-7.298	0
		-7.284	0
		-7.27	0
		-7.256	0
		-7.242	0
		-7.228	0
		-7.214	0
		-7.2	0
		-7.186	0
		-7.172	0
		-7.158	0
		-7.144	0
		-7.13	0
		-7.116	0
		-7.102	0
		-7.088	0
		-7.074	0
		-7.06	0
		-7.046	0
		-7.032	0
		-7.018	0
		-7.004	0
		-6.99	0
		-6.976	0
		-6.962	0
		-6.948	0
		-6.934	0
		-6.92	0
		-6.906	0
		-6.892	0
		-6.878	0
		-6.864	0
		-6.85	0
		-6.836	0
		-6.822	0
		-6.808	0
		-6.794	0
		-6.78	0
		-6.766	0
		-6.752	0
		-6.738	0
		-6.724	0
		-6.71	0
		-6.696	0
		-6.682	0
		-6.668	0
		-6.654	0
		-6.64	0
		-6.626	0
		-6.612	0
		-6.598	0
		-6.584	0
		-6.57	0
		-6.556	0
		-6.542	0
		-6.528	0
		-6.514	0
		-6.5	0
		-6.486	0
		-6.472	0
		-6.458	0
		-6.444	0
		-6.43	0
		-6.416	0
		-6.402	0
		-6.388	0
		-6.374	0
		-6.36	0
		-6.346	0
		-6.332	0
		-6.318	0
		-6.304	0
		-6.29	0
		-6.276	0
		-6.262	0
		-6.248	0
		-6.234	0
		-6.22	0
		-6.206	0
		-6.192	0
		-6.178	0
		-6.164	0
		-6.15	0
		-6.136	0
		-6.122	0
		-6.108	0
		-6.094	0
		-6.08	0
		-6.066	0
		-6.052	0
		-6.038	0
		-6.024	0
		-6.01	0
		-5.996	0
		-5.982	0
		-5.968	0
		-5.954	0
		-5.94	0
		-5.926	0
		-5.912	0
		-5.898	0
		-5.884	0
		-5.87	0
		-5.856	0
		-5.842	0
		-5.828	0
		-5.814	0
		-5.8	0
		-5.786	0
		-5.772	0
		-5.758	0
		-5.744	0
		-5.73	0
		-5.716	0
		-5.702	0
		-5.688	0
		-5.674	0
		-5.66	0
		-5.646	0
		-5.632	0
		-5.618	0
		-5.604	0
		-5.59	0
		-5.576	0
		-5.562	0
		-5.548	0
		-5.534	0
		-5.52	0
		-5.506	0
		-5.492	0
		-5.478	0
		-5.464	0
		-5.45	0
		-5.436	0
		-5.422	0
		-5.408	0
		-5.394	0
		-5.38	0
		-5.366	0
		-5.352	0
		-5.338	0
		-5.324	0
		-5.31	0
		-5.296	0
		-5.282	0
		-5.268	0
		-5.254	0
		-5.24	0
		-5.226	0
		-5.212	0
		-5.198	0
		-5.184	0
		-5.17	0
		-5.156	0
		-5.142	0
		-5.128	0
		-5.114	0
		-5.1	0
		-5.086	0
		-5.072	0
		-5.058	0
		-5.044	0
		-5.03	0
		-5.016	0
		-5.002	0
		-4.988	0
		-4.974	0
		-4.96	0
		-4.946	0
		-4.932	0
		-4.918	0
		-4.904	0
		-4.89	0
		-4.876	0
		-4.862	0
		-4.848	0
		-4.834	0
		-4.82	0
		-4.806	0
		-4.792	0
		-4.778	0
		-4.764	0
		-4.75	0
		-4.736	0
		-4.722	0
		-4.708	0
		-4.694	0
		-4.68	0
		-4.666	0
		-4.652	0
		-4.638	0
		-4.624	0
		-4.61	0
		-4.596	0
		-4.582	0
		-4.568	0
		-4.554	0
		-4.54	0
		-4.526	0
		-4.512	0
		-4.498	0
		-4.484	0
		-4.47	0
		-4.456	0
		-4.442	0
		-4.428	0
		-4.414	0
		-4.4	0
		-4.386	0
		-4.372	0
		-4.358	0
		-4.344	0
		-4.33	0
		-4.316	0
		-4.302	0
		-4.288	0
		-4.274	0
		-4.26	0
		-4.246	0
		-4.232	0
		-4.218	0
		-4.204	0
		-4.19	0
		-4.176	0
		-4.162	0
		-4.148	0
		-4.134	0
		-4.12	0
		-4.106	0
		-4.092	0
		-4.078	0
		-4.064	0
		-4.05	0
		-4.036	0
		-4.022	0
		-4.008	0
		-3.994	0
		-3.98	0
		-3.966	0
		-3.952	0
		-3.938	0
		-3.924	0
		-3.91	0
		-3.896	0
		-3.882	0
		-3.868	0
		-3.854	0
		-3.84	0
		-3.826	0
		-3.812	0
		-3.798	0
		-3.784	0
		-3.77	0
		-3.756	0
		-3.742	0
		-3.728	0
		-3.714	0
		-3.7	0
		-3.686	0
		-3.672	0
		-3.658	4.99702e-08
		-3.644	5.44088e-08
		-3.63	5.92252e-08
		-3.616	6.445e-08
		-3.602	7.01162e-08
		-3.588	7.62592e-08
		-3.574	8.29173e-08
		-3.56	9.01316e-08
		-3.546	9.79462e-08
		-3.532	1.06409e-07
		-3.518	1.1557e-07
		-3.504	1.25485e-07
		-3.49	1.36213e-07
		-3.476	1.47817e-07
		-3.462	1.60364e-07
		-3.448	1.73928e-07
		-3.434	1.88587e-07
		-3.42	2.04424e-07
		-3.406	2.2153e-07
		-3.392	2.39999e-07
		-3.378	2.59936e-07
		-3.364	2.81451e-07
		-3.35	3.04662e-07
		-3.336	3.29694e-07
		-3.322	3.56684e-07
		-3.308	3.85776e-07
		-3.294	4.17124e-07
		-3.28	4.50894e-07
		-3.266	4.87262e-07
		-3.252	5.26416e-07
		-3.238	5.68558e-07
		-3.224	6.13903e-07
		-3.21	6.62679e-07
		-3.196	7.15131e-07
		-3.182	7.71519e-07
		-3.168	8.32121e-07
		-3.154	8.97234e-07
		-3.14	9.67171e-07
		-3.126	1.04227e-06
		-3.112	1.12289e-06
		-3.098	1.2094e-06
		-3.084	1.30222e-06
		-3.07	1.40176e-06
		-3.056	1.5085e-06
		-3.042	1.62291e-06
		-3.028	1.74552e-06
		-3.014	1.87686e-06
		-3	2.01752e-06
		-2.986	2.16812e-06
		-2.972	2.32931e-06
		-2.958	2.50179e-06
		-2.944	2.68629e-06
		-2.93	2.88359e-06
		-2.916	3.09452e-06
		-2.902	3.31995e-06
		-2.888	3.56081e-06
		-2.874	3.81808e-06
		-2.86	4.0928e-06
		-2.846	4.38605e-06
		-2.832	4.69901e-06
		-2.818	5.0329e-06
		-2.804	5.38901e-06
		-2.79	5.7687e-06
		-2.776	6.17343e-06
		-2.762	6.60471e-06
		-2.748	7.06415e-06
		-2.734	7.55344e-06
		-2.72	8.07436e-06
		-2.706	8.62881e-06
		-2.692	9.21875e-06
		-2.678	9.84629e-06
		-2.664	1.05136e-05
		-2.65	1.1223e-05
		-2.636	1.1977e-05
		-2.622	1.2778e-05
		-2.608	1.36288e-05
		-2.594	1.45322e-05
		-2.58	1.54911e-05
		-2.566	1.65088e-05
		-2.552	1.75883e-05
		-2.538	1.87333e-05
		-2.524	1.99472e-05
		-2.51	2.12338e-05
		-2.496	2.25971e-05
		-2.482	2.40413e-05
		-2.468	2.55706e-05
		-2.454	2.71896e-05
		-2.44	2.89031e-05
		-2.426	3.0716e-05
		-2.412	3.26334e-05
		-2.398	3.4661e-05
		-2.384	3.68042e-05
		-2.37	3.9069e-05
		-2.356	4.14617e-05
		-2.342	4.39886e-05
		-2.328	4.66564e-05
		-2.314	4.94723e-05
		-2.3	5.24436e-05
		-2.286	5.55777e-05
		-2.272	5.88827e-05
		-2.258	6.23669e-05
		-2.244	6.60388e-05
		-2.23	6.99075e-05
		-2.216	7.3982e-05
		-2.202	7.82723e-05
		-2.188	8.27882e-05
		-2.174	8.75403e-05
		-2.16	9.25394e-05
		-2.146	9.77966e-05
		-2.132	0.000103324
		-2.118	0.000109133
		-2.104	0.000115236
		-2.09	0.000121647
		-2.076	0.000128379
		-2.062	0.000135445
		-2.048	0.000142861
		-2.034	0.00015064
		-2.02	0.000158799
		-2.006	0.000167353
		-1.992	0.000176319
		-1.978	0.000185713
		-1.964	0.000195553
		-1.95	0.000205857
		-1.936	0.000216643
		-1.922	0.000227932
		-1.908	0.000239741
		-1.894	0.000252092
		-1.88	0.000265005
		-1.866	0.000278503
		-1.852	0.000292606
		-1.838	0.000307337
		-1.824	0.00032272
		-1.81	0.000338779
		-1.796	0.000355537
		-1.782	0.00037302
		-1.768	0.000391254
		-1.754	0.000410265
		-1.74	0.00043008
		-1.726	0.000450725
		-1.712	0.00047223
		-1.698	0.000494624
		-1.684	0.000517934
		-1.67	0.000542192
		-1.656	0.000567428
		-1.642	0.000593673
		-1.628	0.000620958
		-1.614	0.000649316
		-1.6	0.00067878
		-1.586	0.000709384
		-1.572	0.00074116
		-1.558	0.000774143
		-1.544	0.000808369
		-1.53	0.000843873
		-1.516	0.00088069
		-1.502	0.000918858
		-1.488	0.000958412
		-1.474	0.00099939
		-1.46	0.00104183
		-1.446	0.00108577
		-1.432	0.00113124
		-1.418	0.0011783
		-1.404	0.00122696
		-1.39	0.00127728
		-1.376	0.0013293
		-1.362	0.00138304
		-1.348	0.00143856
		-1.334	0.00149589
		-1.32	0.00155507
		-1.306	0.00161614
		-1.292	0.00167914
		-1.278	0.00174411
		-1.264	0.00181109
		-1.25	0.00188011
		-1.236	0.00195123
		-1.222	0.00202446
		-1.208	0.00209986
		-1.194	0.00217747
		-1.18	0.0022573
		-1.166	0.00233942
		-1.152	0.00242384
		-1.138	0.00251061
		-1.124	0.00259977
		-1.11	0.00269133
		-1.096	0.00278535
		-1.082	0.00288185
		-1.068	0.00298085
		-1.054	0.0030824
		-1.04	0.00318652
		-1.026	0.00329324
		-1.012	0.00340258
		-0.998	0.00351457
		-0.984	0.00362924
		-0.97	0.0037466
		-0.956	0.00386668
		-0.942	0.0039895
		-0.928	0.00411506
		-0.914	0.0042434
		-0.9	0.00437452
		-0.886	0.00450843
		-0.872	0.00464514
		-0.858	0.00478467
		-0.844	0.00492701
		-0.83	0.00507217
		-0.816	0.00522016
		-0.802	0.00537096
		-0.788	0.00552458
		-0.774	0.005681
		-0.76	0.00584023
		-0.746	0.00600224
		-0.732	0.00616703
		-0.718	0.00633458
		-0.704	0.00650486
		-0.69	0.00667786
		-0.676	0.00685355
		-0.662	0.00703189
		-0.648	0.00721287
		-0.634	0.00739644
		-0.62	0.00758257
		-0.606	0.00777121
		-0.592	0.00796232
		-0.578	0.00815586
		-0.564	0.00835178
		-0.55	0.00855001
		-0.536	0.00875051
		-0.522	0.00895322
		-0.508	0.00915806
		-0.494	0.00936498
		-0.48	0.0095739
		-0.466	0.00978476
		-0.452	0.00999747
		-0.438	0.010212
		-0.424	0.0104281
		-0.41	0.0106459
		-0.396	0.0108652
		-0.382	0.0110859
		-0.368	0.011308
		-0.354	0.0115313
		-0.34	0.0117557
		-0.326	0.0119811
		-0.312	0.0122075
		-0.298	0.0124347
		-0.284	0.0126625
		-0.27	0.012891
		-0.256	0.0131199
		-0.242	0.0133491
		-0.228	0.0135786
		-0.214	0.0138081
		-0.2	0.0140376
		-0.186	0.014267
		-0.172	0.0144961
		-0.158	0.0147247
		-0.144	0.0149527
		-0.13	0.0151801
		-0.116	0.0154066
		-0.102	0.0156322
		-0.088	0.0158566
		-0.074	0.0160797
		-0.06	0.0163015
		-0.046	0.0165217
		-0.032	0.0167402
		-0.018	0.0169568
		-0.004	0.0171715
		0.01	0.017384
		0.024	0.0175943
		0.038	0.0178021
		0.052	0.0180074
		0.066	0.01821
		0.08	0.0184097
		0.094	0.0186064
		0.108	0.0187999
		0.122	0.0189902
		0.136	0.019177
		0.15	0.0193603
		0.164	0.0195399
		0.178	0.0197157
		0.192	0.0198875
		0.206	0.0200552
		0.22	0.0202186
		0.234	0.0203777
		0.248	0.0205324
		0.262	0.0206824
		0.276	0.0208277
		0.29	0.0209682
		0.304	0.0211038
		0.318	0.0212343
		0.332	0.0213597
		0.346	0.0214798
		0.36	0.0215945
		0.374	0.0217038
		0.388	0.0218076
		0.402	0.0219058
		0.416	0.0219983
		0.43	0.022085
		0.444	0.0221658
		0.458	0.0222408
		0.472	0.0223098
		0.486	0.0223728
		0.5	0.0224296
		0.514	0.0224804
		0.528	0.022525
		0.542	0.0225634
		0.556	0.0225955
		0.57	0.0226214
		0.584	0.022641
		0.598	0.0226542
		0.612	0.0226612
		0.626	0.0226619
		0.64	0.0226562
		0.654	0.0226442
		0.668	0.0226259
		0.682	0.0226014
		0.696	0.0225705
		0.71	0.0225334
		0.724	0.0224901
		0.738	0.0224406
		0.752	0.022385
		0.766	0.0223233
		0.78	0.0222556
		0.794	0.0221819
		0.808	0.0221022
		0.822	0.0220167
		0.836	0.0219254
		0.85	0.0218284
		0.864	0.0217258
		0.878	0.0216176
		0.892	0.021504
		0.906	0.021385
		0.92	0.0212607
		0.934	0.0211312
		0.948	0.0209967
		0.962	0.0208572
		0.976	0.0207129
		0.99	0.0205638
		1.004	0.0204101
		1.018	0.0202519
		1.032	0.0200894
		1.046	0.0199225
		1.06	0.0197516
		1.074	0.0195766
		1.088	0.0193978
		1.102	0.0192153
		1.116	0.0190292
		1.13	0.0188396
		1.144	0.0186467
		1.158	0.0184507
		1.172	0.0182516
		1.186	0.0180496
		1.2	0.0178449
		1.214	0.0176376
		1.228	0.0174278
		1.242	0.0172157
		1.256	0.0170015
		1.27	0.0167852
		1.284	0.0165671
		1.298	0.0163472
		1.312	0.0161258
		1.326	0.0159029
		1.34	0.0156787
		1.354	0.0154534
		1.368	0.0152271
		1.382	0.0149999
		1.396	0.014772
		1.41	0.0145435
		1.424	0.0143145
		1.438	0.0140852
		1.452	0.0138557
		1.466	0.0136261
		1.48	0.0133966
		1.494	0.0131673
		1.508	0.0129384
		1.522	0.0127098
		1.536	0.0124818
		1.55	0.0122545
		1.564	0.012028
		1.578	0.0118023
		1.592	0.0115777
		1.606	0.0113542
		1.62	0.0111318
		1.634	0.0109108
		1.648	0.0106912
		1.662	0.0104731
		1.676	0.0102566
		1.69	0.0100418
		1.704	0.00982867
		1.718	0.00961743
		1.732	0.0094081
		1.746	0.00920076
		1.76	0.00899548
		1.774	0.00879232
		1.788	0.00859136
		1.802	0.00839265
		1.816	0.00819625
		1.83	0.00800222
		1.844	0.0078106
		1.858	0.00762144
		1.872	0.00743479
		1.886	0.00725068
		1.9	0.00706917
		1.914	0.00689027
		1.928	0.00671403
		1.942	0.00654048
		1.956	0.00636963
		1.97	0.00620151
		1.984	0.00603615
		1.998	0.00587356
		2.012	0.00571376
		2.026	0.00555675
		2.04	0.00540255
		2.054	0.00525116
		2.068	0.0051026
		2.082	0.00495685
		2.096	0.00481392
		2.11	0.00467382
		2.124	0.00453652
		2.138	0.00440203
		2.152	0.00427033
		2.166	0.00414142
		2.18	0.00401528
		2.194	0.0038919
		2.208	0.00377125
		2.222	0.00365333
		2.236	0.00353811
		2.25	0.00342556
		2.264	0.00331567
		2.278	0.00320841
		2.292	0.00310376
		2.306	0.00300168
		2.32	0.00290215
		2.334	0.00280513
		2.348	0.00271061
		2.362	0.00261854
		2.376	0.00252889
		2.39	0.00244162
		2.404	0.00235672
		2.418	0.00227413
		2.432	0.00219382
		2.446	0.00211576
		2.46	0.0020399
		2.474	0.00196622
		2.488	0.00189467
		2.502	0.00182522
		2.516	0.00175782
		2.53	0.00169244
		2.544	0.00162903
		2.558	0.00156756
		2.572	0.001508
		2.586	0.00145029
		2.6	0.0013944
		2.614	0.00134029
		2.628	0.00128792
		2.642	0.00123725
		2.656	0.00118824
		2.67	0.00114086
		2.684	0.00109506
		2.698	0.00105081
		2.712	0.00100806
		2.726	0.000966782
		2.74	0.000926936
		2.754	0.000888485
		2.768	0.000851391
		2.782	0.000815618
		2.796	0.00078113
		2.81	0.000747892
		2.824	0.000715869
		2.838	0.000685025
		2.852	0.000655328
		2.866	0.000626743
		2.88	0.000599238
		2.894	0.000572781
		2.908	0.000547339
		2.922	0.000522881
		2.936	0.000499376
		2.95	0.000476795
		2.964	0.000455109
		2.978	0.000434287
		2.992	0.000414303
		3.006	0.000395128
		3.02	0.000376735
		3.034	0.000359098
		3.048	0.000342192
		3.062	0.00032599
		3.076	0.000310469
		3.09	0.000295605
		3.104	0.000281374
		3.118	0.000267753
		3.132	0.00025472
		3.146	0.000242254
		3.16	0.000230334
		3.174	0.00021894
		3.188	0.000208051
		3.202	0.000197649
		3.216	0.000187714
		3.23	0.000178229
		3.244	0.000169176
		3.258	0.000160538
		3.272	0.000152298
		3.286	0.000144442
		3.3	0.000136952
		3.314	0.000129814
		3.328	0.000123015
		3.342	0.000116538
		3.356	0.000110372
		3.37	0.000104503
		3.384	9.8919e-05
		3.398	9.36068e-05
		3.412	8.85552e-05
		3.426	8.37529e-05
		3.44	7.91889e-05
		3.454	7.48527e-05
		3.468	7.07343e-05
		3.482	6.68238e-05
		3.496	6.31119e-05
		3.51	5.95895e-05
		3.524	5.62481e-05
		3.538	5.30792e-05
		3.552	5.00748e-05
		3.566	4.72274e-05
		3.58	4.45294e-05
		3.594	4.19739e-05
		3.608	3.95539e-05
		3.622	3.72631e-05
		3.636	3.50952e-05
		3.65	3.30442e-05
		3.664	3.11044e-05
		3.678	2.92703e-05
		3.692	2.75367e-05
		3.706	2.58985e-05
		3.72	2.4351e-05
		3.734	2.28895e-05
		3.748	2.15098e-05
		3.762	2.02076e-05
		3.776	1.89789e-05
		3.79	1.782e-05
		3.804	1.67272e-05
		3.818	1.5697e-05
		3.832	1.47262e-05
		3.846	1.38115e-05
		3.86	1.29501e-05
		3.874	1.21389e-05
		3.888	1.13755e-05
		3.902	1.0657e-05
		3.916	9.98118e-06
		3.93	9.34559e-06
		3.944	8.74803e-06
		3.958	8.1864e-06
		3.972	7.65869e-06
		3.986	7.16299e-06
[truncated: 1 more rows]
